# Supplementary material for: Inferences of Diplodocoid (Sauropoda: Dinosauria) Feeding Behavior from Snout Shape and Microwear Analyses
Source: PLoS One. 2011 Apr 6;6(4):e18304. doi: 10.1371/journal.pone.0018304 (PMC3071828; doi:10.1371/journal.pone.0018304)
Supplement: Table S3 — Complete list of microwear features (including dimensions, area, and type) for all teeth examined. (XLSX) [file pone.0018304.s003.xlsx]

## Sheet: Title
	Table S3. Complete list of microwear features (including dimensions, area, and type) for all teeth examined.

## Sheet: Apatosaurus CMC VP7180
	L1	L2	Ratio	Area	Scratch Length	Scratch Breadth
PITS/GOUGES	19.389	21.2115	1.094	323.011
	10.1446	9.2224	1.1	73.4802
	14.7558	14.5819	1.01193	168.993
	6.45568	6.45568	1	32.7321
	13.8336	17.6194	1.27366	191.432
	24.0491	23.056	1.04307	435.484
	16.7025	15.6781	1.06534	205.666
	10.1446	11.0669	1.09091	88.1762
	11.2195	6.45568	1.73793	56.8862
	7.60498	5.53344	1.37437	33.0509
	8.24876	8.50263	1.03078	55.0848
	5.53344	4.6112	1.2	20.0401
	9.2224	8.30016	1.11111	60.1202
	11.0669	11.0669	1	96.1923
	6.71401	6.52122	1.02956	34.3875
	4.70252	4.6112	1.0198	17.0308
	3.68896	4.6112	1.25	13.36
	8.30016	9.2224	1.11111	60.1202
	9.2684	6.45568	1.4357	46.9934
	6.45568	8.30016	1.28571	42.0841
	5.53344	8.30016	1.5	36.0721
	12.9114	6.45568	2	65.4642
	7.37792	9.2224	1.25	53.4402
	11.9891	8.30016	1.44444	78.1562
	9.2224	10.1446	1.1	73.4802
	11.9891	7.37792	1.625	69.4722
	12.9114	8.35124	1.54604	84.6862
	10.1446	7.37792	1.375	58.7842
	11.1052	7.37792	1.5052	64.3505
	7.60498	9.2224	1.21268	55.0848
	10.1446	7.37792	1.375	58.7842
	11.2195	9.62847	1.16525	84.8441
	6.45568	6.45568	1	32.7321
	1.84448	2.76672	1.5	4.00801
	4.6112	4.70252	1.0198	17.0308
	5.83276	8.30016	1.42302	38.0233
	5.53344	7.43534	1.34371	32.3136
	6.45568	4.6112	1.4	23.3801
	8.35124	7.37792	1.13192	48.3921
	8.35124	7.87962	1.05985	51.6828
	10.1446	7.37792	1.375	58.7842
	7.37792	6.45568	1.14286	37.4081
	10.5152	7.82547	1.34371	64.6272
	6.45568	6.45568	1	32.7321
	6.52122	6.71401	1.02956	34.3875
	7.02357	6.52122	1.07703	35.973
	6.45568	6.45568	1	32.7321
	7.43534	8.50263	1.14354	49.6528
	5.83276	6.52122	1.11803	29.874
	8.50263	5.90522	1.43985	39.4347
	5.90522	5.21698	1.13192	24.1961
	5.37754	4.12438	1.30384	17.4194
	6.45568	6.45568	1	32.7321
	5.53344	8.30016	1.5	36.0721
	5.60977	4.6112	1.21655	20.3165
	4.6112	4.6112	1	16.7
	4.6112	2.76672	1.66667	10.02
	9.2224	7.37792	1.25	53.4402
	6.45568	5.53344	1.16667	28.0561
	14.317	10.1865	1.40549	114.542
	7.87962	7.02357	1.12188	43.4663
	29.4106	30.2095	1.02716	697.811
	6.45568	8.30016	1.28571	42.0841
	5.90522	9.12971	1.54604	42.3431
	7.60498	5.83276	1.30384	34.8387
	8.74914	5.60977	1.55963	38.5478
	13.8336	7.43534	1.86052	80.7841
	9.93283	7.87962	1.26057	61.4707
	11.1052	7.37792	1.5052	64.3505
	11.9891	11.2195	1.06859	105.646
	6.45568	7.37792	1.14286	37.4081
	5.53344	6.52122	1.17851	28.3409
	6.45568	4.70252	1.37281	23.8431
	4.6112	5.53344	1.2	20.0401
	5.53344	6.45568	1.16667	28.0561
	3.80249	6.45568	1.69775	19.2797
	28.723	12.0245	2.3887	271.261
	3.80249	10.434	2.74398	31.1607
	5.21698	5.90522	1.13192	24.1961
	9.2224	7.37792	1.25	53.4402
	5.53344	5.53344	1	24.0481
	8.24876	8.50263	1.03078	55.0848
	5.60977	6.18657	1.10282	27.2574
	6.18657	7.43534	1.20185	36.1277
	8.50263	11.1052	1.30609	74.1602
	8.70039	6.65037	1.30826	45.4438
	6.71401	6.52122	1.02956	34.3875
	5.37754	7.93341	1.47529	33.5068
	27.3891	13.7101	1.99774	294.923
	12.3042	9.2684	1.32755	89.5671
	12.9114	11.9891	1.07692	121.576
	17.1547	11.8104	1.4525	159.125
	7.37792	8.30016	1.125	48.0961
	9.97555	11.1052	1.11325	87.0071
	7.02357	7.87962	1.12188	43.4663
	7.20292	6.52122	1.10454	36.8916
	8.50263	7.93341	1.07175	52.9789
	6.52122	8.50263	1.30384	43.5484
	27.5131	24.2077	1.13654	523.097
	7.43534	12.0245	1.61722	70.2197
	7.37792	12.9443	1.75446	75.0068
	5.83276	13.0424	2.23607	59.7479
	10.434	11.8104	1.13192	96.7842
	5.37754	5.53344	1.02899	23.3705
	4.70252	4.6112	1.0198	17.0308
	6.52122	9.2684	1.42127	47.4705
	9.2224	6.71401	1.37361	48.6313
	9.12971	11.5556	1.26572	82.8592
	5.90522	9.49504	1.60791	44.0375

## Sheet: BrachiosaurusMB.R.2190
	Length 1	Length 2	Ratio	Area	Scratch Length	Scratch Breadth
SCRATCHES	106.766	2.06267	51.761		106.766	2.06267
	129.699	2.91706	44.4623		129.699	2.91706
	145.18	3.32595	43.6507		145.18	3.32595
	85.3058	2.06267	41.357		85.3058	2.06267
	119.908	3.32595	36.0523		119.908	3.32595
	73.4496	2.06267	35.609		73.4496	2.06267
	113.597	3.32595	34.1546		113.597	3.32595
	92.8568	2.76736	33.5543		92.8568	2.76736
	89.3305	2.76736	32.28		89.3305	2.76736
	66.0054	2.06267	32		66.0054	2.06267
	152.093	4.96757	30.6172		152.093	4.96757
	61.5354	2.06267	29.8329		61.5354	2.06267
	84.3529	2.91706	28.9171		84.3529	2.91706
	57.1773	2.06267	27.72		57.1773	2.06267
	53.0952	2.06267	25.741		53.0952	2.06267
	100.412	3.91364	25.6569		100.412	3.91364
	52.2552	2.06267	25.3338		52.2552	2.06267
	103.943	4.12534	25.1962		103.943	4.12534
	95.7088	3.91364	24.4552		95.7088	3.91364
	105.358	4.70361	22.3993		105.358	4.70361
	63.7228	2.91706	21.8449		63.7228	2.91706
	61.8526	2.91706	21.2038		61.8526	2.91706
	54.8531	2.60909	21.0238		54.8531	2.60909
	63.9428	3.32595	19.2254		63.9428	3.32595
	49.1245	2.60909	18.8282		49.1245	2.60909
	86.3862	4.61227	18.7297		86.3862	4.61227
	45.3881	2.60909	17.3961		45.3881	2.60909
	47.1265	2.76736	17.0294		47.1265	2.76736
	56.1183	3.32595	16.8728		56.1183	3.32595
	108.947	6.45718	16.8723		108.947	6.45718
	41.6741	2.60909	15.9726		41.6741	2.60909
	52.588	3.32595	15.8114		52.588	3.32595
	44.9832	2.91706	15.4208		44.9832	2.91706
	42.0805	2.91706	14.4257		42.0805	2.91706
	54.456	3.80338	14.3178		54.456	3.80338
	47.4862	3.32595	14.2775		47.4862	3.32595
	36.8635	2.60909	14.1289		36.8635	2.60909
	53.0952	3.80338	13.96		53.0952	3.80338
	54.456	3.91364	13.9144		54.456	3.91364
	35.4995	2.60909	13.6061		35.4995	2.60909
	40.8388	3.32595	12.2788		40.8388	3.32595
	35.4995	2.91706	12.1696		35.4995	2.91706
	49.3405	4.12534	11.9604		49.3405	4.12534
	82.3468	7.43706	11.0725		82.3468	7.43706
	36.5855	3.32595	11		36.5855	3.32595
	42.563	3.91364	10.8756		42.563	3.91364
	31.3091	2.91706	10.7331		31.3091	2.91706
	37.9554	3.80338	9.97939		37.9554	3.80338
	72.8972	7.37963	9.87816		72.8972	7.37963
	32.2199	3.32595	9.68742		32.2199	3.32595
	31.9814	3.32595	9.61569		31.9814	3.32595
	24.9233	2.60909	9.55249		24.9233	2.60909
	35.126	3.68982	9.51972		35.126	3.68982
	24.7864	2.60909	9.5		24.7864	2.60909
	26.0909	2.76736	9.42809		26.0909	2.76736
	34.9195	4.12534	8.46463		34.9195	4.12534
	44.0079	5.21819	8.43356		44.0079	5.21819
	34.441	4.12534	8.34865		34.441	4.12534
	35.4395	4.61227	7.68375		35.4395	4.61227
	34.1308	4.61227	7.4		34.1308	4.61227
	29.1268	4.70361	6.19243		29.1268	4.70361
	34.7362	6.18801	5.61348		34.7362	6.18801
	29.1706	5.21819	5.59017		29.1706	5.21819
	40.6299	7.43706	5.46316		40.6299	7.43706
	19.4592	3.68982	5.27376		19.4592	3.68982
	43.0698	8.30209	5.18783		43.0698	8.30209
	18.6555	3.68982	5.05594		18.6555	3.68982
	19.4592	3.91364	4.97214		19.4592	3.91364
	26.8623	5.83411	4.60435		26.8623	5.83411
	22.7829	4.96757	4.58634		22.7829	4.96757
	31.9681	7.2046	4.43718		31.9681	7.2046
	49.4439	11.2221	4.40592		49.4439	11.2221
PITS/GOUGES	19.4592	5.21819	3.72911	79.7507
	28.9656	10.3133	2.80856	234.624
	23.0798	8.50461	2.7138	154.161
	17.5266	8.30209	2.11111	114.281
	22.8203	11.1078	2.05443	199.085
	13.9593	7.43706	1.87699	81.5368
	57.7326	31.5528	1.82972	1430.7
	63.9428	35.0047	1.82669	1757.95
	9.80582	5.37878	1.82305	41.4246
	8.70241	4.96757	1.75185	33.9526
	7.93525	4.61227	1.72047	28.7452
	9.40722	5.83411	1.61245	43.1048
	4.70361	2.91706	1.61245	10.7762
	9.49724	5.90659	1.60791	44.0579
	85.3656	53.3829	1.59912	3579.11
	7.43706	4.70361	1.58114	27.474
	7.43706	4.96757	1.49712	29.0158
	12.8483	8.75117	1.46818	88.3083
	6.65191	4.61227	1.44222	24.0963
	5.83411	4.12534	1.41421	18.9027
	9.22454	6.52273	1.41421	47.2568
	61.5354	44.0948	1.39552	2131.09
	10.3133	7.43706	1.38675	60.2408
	6.52273	4.70361	1.38675	24.0963
	7.93525	5.83411	1.36015	36.3601
	82.145	62.7879	1.30829	4050.86
	8.50461	6.52273	1.30384	43.5686
	8.35318	6.45718	1.29363	42.3628
	7.43706	5.83411	1.27475	34.0774
	8.25068	6.71557	1.22859	43.5173
	7.43706	6.18801	1.20185	36.1445
	6.52273	5.53472	1.17851	28.3541
	24.9745	21.2965	1.1727	417.729
	7.60675	6.52273	1.16619	38.969
	21.9265	19.0169	1.153	327.49
	6.71557	5.83411	1.15109	30.7714
	11.4101	9.93513	1.14846	89.0336
	10.797	9.49724	1.13686	80.5364
	11.26	9.93513	1.13335	87.8621
	7.37963	6.52273	1.13137	37.8054
	4.61227	4.12534	1.11803	14.9439
	9.49724	8.50461	1.11672	63.4369
	9.6307	8.70241	1.10667	65.8245
	8.35318	7.60675	1.09813	49.9046
	114.101	105.378	1.08278	9443.44
	9.6307	9.08512	1.06005	68.7192
	5.61107	5.37878	1.04319	23.7039
	7.60675	7.43706	1.02282	44.4314
	5.61107	5.53472	1.01379	24.3911

## Sheet: CamarasaurusUUVP1949
	L1	L2	Ratio	Area	Scratch Length	Scratch Breadth
SCRATCHES	185.707	3.68909	50.3395		185.707	3.68909
	61.3155	1.30429	47.0106		61.3155	1.30429
	181.294	4.12452	43.9551		181.294	4.12452
	113.241	2.91648	38.8278		113.241	2.91648
	138.418	3.68909	37.5208		138.418	3.68909
	96.6627	2.60858	37.0557		96.6627	2.60858
	117.567	3.3253	35.3553		117.567	3.3253
	70.2018	2.06226	34.0412		70.2018	2.06226
	96.8429	2.91648	33.2054		96.8429	2.91648
	62.8229	2.06226	30.4631		62.8229	2.06226
	86.2854	2.91648	29.5855		86.2854	2.91648
	97.7129	3.3253	29.3847		97.7129	3.3253
	79.6578	2.76681	28.7904		79.6578	2.76681
	106.545	3.91287	27.2295		106.545	3.91287
	76.5708	2.91648	26.2545		76.5708	2.91648
	86.3445	3.3253	25.966		86.3445	3.3253
	51.6225	2.06226	25.032		51.6225	2.06226
	120.023	4.96658	24.1661		120.023	4.96658
	66.9203	2.91648	22.9456		66.9203	2.91648
	46.2609	2.06226	22.4321		46.2609	2.06226
	59.976	2.76681	21.6769		59.976	2.76681
	72.912	3.68909	19.7642		72.912	3.68909
	52.6018	2.91648	18.0361		52.6018	2.91648
	49.0107	2.76681	17.7138		49.0107	2.76681
	50.7333	2.91648	17.3954		50.7333	2.91648
	71.2481	4.12452	17.2743		71.2481	4.12452
	65.4813	3.80262	17.22		65.4813	3.80262
	43.5035	2.60858	16.6771		43.5035	2.60858
	46.1228	2.91648	15.8146		46.1228	2.91648
	39.7327	2.60858	15.2315		39.7327	2.60858
	28.8274	2.06226	13.9786		28.8274	2.06226
	37.8581	2.76681	13.6829		37.8581	2.76681
	50.8589	3.80262	13.3747		50.8589	3.80262
	38.7793	2.91648	13.2966		38.7793	2.91648
	42.8732	3.3253	12.8931		42.8732	3.3253
	48.8804	3.80262	12.8544		48.8804	3.80262
	36.0159	2.91648	12.3491		36.0159	2.91648
	50.1091	4.12452	12.1491		50.1091	4.12452
	44.2786	3.68909	12.0026		44.2786	3.68909
	54.2261	4.61136	11.7593		54.2261	4.61136
	43.3468	3.68909	11.75		43.3468	3.68909
	34.2236	2.91648	11.7346		34.2236	2.91648
	43.2289	3.68909	11.718		43.2289	3.68909
	38.7464	3.3253	11.652		38.7464	3.3253
	41.173	3.80262	10.8275		41.173	3.80262
	35.9213	3.3253	10.8024		35.9213	3.3253
	40.5904	3.80262	10.6743		40.5904	3.80262
	43.9702	4.12452	10.6607		43.9702	4.12452
	38.7793	3.68909	10.5119		38.7793	3.68909
	27.1248	2.60858	10.3983		27.1248	2.60858
	20.9093	2.06226	10.139		20.9093	2.06226
	46.2609	4.61136	10.0319		46.2609	4.61136
	32.6072	3.3253	9.80581		32.6072	3.3253
	26.2321	2.76681	9.48098		26.2321	2.76681
	27.3901	2.91648	9.39149		27.3901	2.91648
	34.1365	3.68909	9.25338		34.1365	3.68909
	42.5846	4.61136	9.23472		42.5846	4.61136
	41.8289	4.70268	8.89468		41.8289	4.70268
	57.9198	6.71424	8.62642		57.9198	6.71424
	39.6577	4.70268	8.43299		39.6577	4.70268
	37.9142	4.61136	8.22192		37.9142	4.61136
	27.1248	3.3253	8.15711		27.1248	3.3253
	30.4489	3.91287	7.78175		30.4489	3.91287
	36.263	4.70268	7.71113		36.263	4.70268
	38.0262	4.96658	7.65641		38.0262	4.96658
	28.8717	3.80262	7.59257		28.8717	3.80262
	28.0498	3.80262	7.37643		28.0498	3.80262
	33.8362	4.61136	7.33757		33.8362	4.61136
	33.253	4.61136	7.2111		33.253	4.61136
	38.3603	5.37772	7.13319		38.3603	5.37772
	20.1427	2.91648	6.90652		20.1427	2.91648
	22.8344	3.3253	6.86687		22.8344	3.3253
	28.2312	4.12452	6.84471		28.2312	4.12452
	24.9184	3.80262	6.55295		24.9184	3.80262
	23.9791	3.68909	6.5		23.9791	3.68909
	23.9436	3.80262	6.29659		23.9436	3.80262
	20.4154	3.3253	6.13941		20.4154	3.3253
	17.4989	2.91648	6		17.4989	2.91648
	26.6184	4.61136	5.77235		26.6184	4.61136
	15.0135	2.60858	5.75543		15.0135	2.60858
	25.5088	4.61136	5.53173		25.5088	4.61136
	20.1427	3.68909	5.46008		20.1427	3.68909
	27.6835	5.21716	5.30625		27.6835	5.21716
	14.5824	2.76681	5.27046		14.5824	2.76681
	6.71424	35.3484	5.26469		35.3484	6.71424
	38.8341	7.60525	5.10622		38.8341	7.60525
	27.4211	5.37772	5.09902		27.4211	5.37772
	23.1121	4.61136	5.01199		23.1121	4.61136
	28.0043	5.60996	4.99189		28.0043	5.60996
	18.5374	3.80262	4.87491		18.5374	3.80262
	27.7449	5.90542	4.69821		27.7449	5.90542
	12.1306	2.76681	4.38432		12.1306	2.76681
	24.2085	5.53363	4.3748		24.2085	5.53363
	30.5605	7.02381	4.35098		30.5605	7.02381
	24.0499	5.53363	4.34613		24.0499	5.53363
	24.8329	5.83296	4.25735		24.8329	5.83296
	15.7598	3.80262	4.14445		15.7598	3.80262
	16.1332	3.91287	4.12311		16.1332	3.91287
	11.6659	2.91648	4		11.6659	2.91648
PITS/GOUGES	18.3761	4.61136	3.98497	66.5538
	18.4685	4.70268	3.92722	68.2129
	39.6684	10.145	3.91015	316.072
	17.5232	4.61136	3.8	63.4645
	24.8329	6.65059	3.73394	129.711
	21.9221	5.90542	3.71221	101.677
	2.76681	10.145	3.66667	22.0456
	23.5134	6.52144	3.60555	120.434
	19.9091	5.83296	3.41321	91.2075
	15.7057	4.61136	3.40588	56.8822
	20.9093	6.18679	3.37968	101.6
	16.703	4.96658	3.36309	65.1544
	12.3046	3.68909	3.33542	35.6515
	13.7106	4.12452	3.32415	44.4139
	13.6172	4.12452	3.30151	44.1114
	15.1264	4.61136	3.28024	54.784
	15.2663	4.70268	3.2463	56.3858
	8.50292	27.4211	3.2249	183.123
	28.8717	9.08332	3.17854	205.971
	8.30044	26.0858	3.1427	170.057
	9.08332	2.91648	3.11448	20.8062
	30.9202	9.97589	3.09949	242.261
	18.6746	6.18679	3.01846	90.7414
	9.97589	3.3253	3	26.0539
	11.4079	3.80262	3	34.0704
	33.253	11.1056	2.99425	290.044
	13.3012	4.61136	2.88444	48.1736
	9.49537	3.3253	2.85549	24.7989
	7.87989	2.76681	2.848	17.1234
	12.3046	4.70268	2.61652	45.4469
	12.0249	4.61136	2.60768	43.5514
	11.8108	4.61136	2.56125	42.7759
	6.52144	2.60858	2.5	13.361
	16.4206	6.65059	2.46904	85.7707
	8.50292	19.9091	2.34144	132.957
	18.9907	8.24905	2.30217	123.037
	17.9073	7.82573	2.28826	110.064
	9.26871	4.12452	2.24722	30.025
	22.6098	10.1868	2.21951	180.894
	16.6265	7.60525	2.18619	99.3124
	5.60996	12.0249	2.1435	52.9825
	23.9791	11.2578	2.13	212.019
	10.1868	4.96658	2.05107	39.7362
	7.93368	3.91287	2.02759	24.3815
	28.9452	14.3175	2.02167	325.487
	16.3166	32.7114	2.00479	419.199
	3.91287	7.82573	2	24.0497
	12.3046	6.18679	1.98886	59.7893
	9.08332	4.61136	1.96977	32.8975
	12.9447	6.71424	1.92795	68.2619
	11.1056	5.83296	1.90394	50.877
	14.8712	7.82573	1.90029	91.403
	9.22272	17.4014	1.8868	126.047
	9.80388	5.21716	1.87916	40.1718
	9.80388	5.37772	1.82305	41.4082
	16.4981	9.08332	1.81631	117.698
	10.1868	5.60996	1.81585	44.8837
	7.02381	12.5442	1.78596	69.2002
	10.5155	18.6746	1.77591	154.231
	6.65059	11.8108	1.77591	61.6923
	3.3253	5.83296	1.75412	15.2338
	6.4559	3.68909	1.75	18.7053
	6.4559	3.68909	1.75	18.7053
	40.8411	23.3501	1.74908	748.989
	6.52144	3.80262	1.71499	19.4768
	27.4211	16.1068	1.70246	346.883
	10.3113	6.18679	1.66667	50.1036
	6.65059	4.12452	1.61245	21.5439
	18.4685	29.5271	1.59878	428.294
	7.43559	4.70268	1.58114	27.4632
	6.4559	10.1868	1.57791	51.6518
	8.70069	5.60996	1.55094	38.3357
	9.08332	5.90542	1.53813	42.1294
	11.8108	7.82573	1.50923	72.5932
	8.30044	5.53363	1.5	36.0746
	9.26871	6.18679	1.49815	45.0375
	3.80262	5.60996	1.47529	16.7546
	7.93368	5.37772	1.47529	33.5091
	6.4559	9.40536	1.45686	47.6894
	6.71424	4.61136	1.45602	24.3173
	11.0673	16.1068	1.45535	140.003
	4.96658	7.20317	1.45033	28.0977
	4.61136	6.65059	1.44222	24.0868
	18.4685	12.9118	1.43036	187.287
	17.812	12.5442	1.41994	175.488
	6.52144	4.70268	1.38675	24.0868
	6.18679	8.50292	1.37437	41.3165
	6.18679	8.50292	1.37437	41.3165
	7.02381	5.21716	1.34629	28.7804
	5.21716	7.02381	1.34629	28.7804
	9.80388	7.43559	1.31851	57.2537
	8.30044	6.4559	1.28571	42.087
	8.50292	6.65059	1.27852	44.4139
	7.87989	6.18679	1.27366	38.2891
	16.6009	13.2049	1.25717	172.17
	7.87989	9.80388	1.24416	60.6748
	5.83296	4.70268	1.24035	21.5439
	3.80262	4.70268	1.23669	14.0449
	6.65059	5.37772	1.23669	28.0898
	7.43559	9.13002	1.22788	53.3184
	3.80262	4.61136	1.21268	13.7722
	4.96658	4.12452	1.20416	16.0887
	5.53363	4.61136	1.2	20.0414
	3.91287	4.61136	1.17851	14.1714
	6.52144	5.53363	1.17851	28.3429
	7.43559	8.74944	1.1767	51.0958
	5.53363	6.4559	1.16667	28.058
	5.60996	6.52144	1.16248	28.7338
	5.83296	6.71424	1.15109	30.7592
	13.8648	12.1306	1.14296	132.095
	5.60996	4.96658	1.12954	21.883
	5.53363	4.96658	1.11417	21.5853
	5.53363	4.96658	1.11417	21.5853
	4.70268	5.21716	1.1094	19.2694
	5.60996	6.18679	1.10282	27.2593
	5.37772	5.83296	1.08465	24.6364
	12.9447	12.1306	1.06711	123.329
	5.83296	6.18679	1.06066	28.3429
	4.70268	4.96658	1.05612	18.344
	6.52144	6.71424	1.02956	34.3899
	4.61136	4.70268	1.0198	17.0319
	5.60996	5.53363	1.01379	24.3815
	5.60996	5.60996	1	24.7178
	7.43559	7.43559	1	43.4231

## Sheet: CamarasaurusUUVP3986
	Length 1	Length 2	Ratio	Area	Scratch Length	Scratch Breadth
SCRATCHES	774.489	3.91094	198.032		774.489	3.91094
	442.857	3.68727	120.104		442.857	3.68727
	486.808	4.70036	103.568		486.808	4.70036
	169.055	1.84363	91.6965		169.055	1.84363
	182.627	2.06125	88.6002		182.627	2.06125
	524.568	6.64732	78.9143		524.568	6.64732
	206.407	2.91504	70.8075		206.407	2.91504
	194.372	2.76545	70.2859		194.372	2.76545
	328.832	4.70036	69.9588		328.832	4.70036
	227.33	3.32366	68.3976		227.33	3.32366
	116.514	1.84363	63.1981		116.514	1.84363
	258.175	4.12249	62.6259		258.175	4.12249
	219.665	3.80075	57.7953		219.665	3.80075
	167.162	2.91504	57.3446		167.162	2.91504
	210.921	3.91094	53.931		210.921	3.91094
	198.499	3.68727	53.8337		198.499	3.68727
	98.9098	1.84363	53.6493		98.9098	1.84363
	195.062	3.68727	52.9014		195.062	3.68727
	145.147	2.76545	52.486		145.147	2.76545
	93.5588	1.84363	50.7469		93.5588	1.84363
	187.118	3.80075	49.2317		187.118	3.80075
	97.2288	2.06125	47.1699		97.2288	2.06125
	94.4762	2.06125	45.8345		94.4762	2.06125
	92.7378	2.06125	44.9911		92.7378	2.06125
	174.44	3.91094	44.6032		174.44	3.91094
	187.401	4.60909	40.6591		187.401	4.60909
	184.006	4.60909	39.9224		184.006	4.60909
	129.793	3.32366	39.0512		129.793	3.32366
	79.2977	2.06125	38.4708		79.2977	2.06125
	121.976	3.32366	36.6994		121.976	3.32366
	100.782	2.76545	36.4433		100.782	2.76545
	100.685	2.76545	36.4082		100.685	2.76545
	170.516	4.70036	36.2772		170.516	4.70036
	132.978	3.68727	36.0642		132.978	3.68727
	236.104	6.64732	35.5187		236.104	6.64732
	96.5051	2.76545	34.8967		96.5051	2.76545
	96.4038	2.76545	34.86		96.4038	2.76545
	71.0756	2.06125	34.4819		71.0756	2.06125
	127.438	3.80075	33.5296		127.438	3.80075
	91.3018	2.76545	33.0151		91.3018	2.76545
	92.2969	2.91504	31.6623		92.2969	2.91504
	84.1332	2.76545	30.4229		84.1332	2.76545
	82.2951	2.76545	29.7583		82.2951	2.76545
	122.182	4.12249	29.6378		122.182	4.12249
	134.727	4.60909	29.2308		134.727	4.60909
	59.9819	2.06125	29.0998		59.9819	2.06125
	95.3892	3.32366	28.7		95.3892	3.32366
	106.907	3.80075	28.1279		106.907	3.80075
	146.479	5.37507	27.2516		146.479	5.37507
	74.7184	2.76545	27.0185		74.7184	2.76545
	120.066	4.60909	26.05		120.066	4.60909
	97.3205	3.80075	25.6056		97.3205	3.80075
	116.514	4.60909	25.2792		116.514	4.60909
	82.5837	3.32366	24.8472		82.5837	3.32366
	70.2096	2.91504	24.0853		70.2096	2.91504
	98.0815	4.12249	23.7918		98.0815	4.12249
	63.6655	2.76545	23.0217		63.6655	2.76545
	83.2907	3.68727	22.5887		83.2907	3.68727
	83.1988	3.80075	21.8901		83.1988	3.80075
	60.4898	2.76545	21.8734		60.4898	2.76545
	90.0979	4.12249	21.8552		90.0979	4.12249
	56.5999	2.60729	21.7083		56.5999	2.60729
	62.7919	2.91504	21.5407		62.7919	2.91504
	76.8433	3.68727	20.8402		76.8433	3.68727
	114.839	5.5309	20.7632		114.839	5.5309
	93.5043	4.60909	20.2869		93.5043	4.60909
	113.548	5.6072	20.2505		113.548	5.6072
	93.8716	4.70036	19.9711		93.8716	4.70036
	57.1824	2.91504	19.6163		57.1824	2.91504
	74.2106	3.80075	19.5252		74.2106	3.80075
	25.4295	1.30365	19.5064		25.4295	1.30365
	87.1836	4.60909	18.9156		87.1836	4.60909
	75.8583	4.12249	18.4011		75.8583	4.12249
	52.8339	2.91504	18.1246		52.8339	2.91504
	67.4503	3.80075	17.7466		67.4503	3.80075
	80.6366	4.70036	17.1554		80.6366	4.70036
	34.1072	2.06125	16.5469		34.1072	2.06125
	58.1403	3.68727	15.7678		58.1403	3.68727
	61.6585	3.91094	15.7656		61.6585	3.91094
	44.4006	2.91504	15.2315		44.4006	2.91504
	99.8716	6.64732	15.0243		99.8716	6.64732
	30.698	2.06125	14.893		30.698	2.06125
	56.4044	3.80075	14.8403		56.4044	3.80075
	42.6534	2.91504	14.6322		42.6534	2.91504
	42.3033	2.91504	14.5121		42.3033	2.91504
	26.3968	1.84363	14.3178		26.3968	1.84363
	50.909	3.68727	13.8067		50.909	3.68727
	27.8993	2.06125	13.5351		27.8993	2.06125
	44.9805	3.32366	13.5334		44.9805	3.32366
	55.2245	4.12249	13.3959		55.2245	4.12249
	50.7753	3.80075	13.3593		50.7753	3.80075
	37.974	2.91504	13.0269		37.974	2.91504
	49.4098	3.80075	13		49.4098	3.80075
	49.1684	3.80075	12.9365		49.1684	3.80075
	52.9624	4.12249	12.8472		52.9624	4.12249
	47.0488	3.68727	12.7598		47.0488	3.68727
	48.0142	3.80075	12.6328		48.0142	3.80075
	34.1197	2.76545	12.3378		34.1197	2.76545
	40.0222	3.32366	12.0416		40.0222	3.32366
	44.2856	3.68727	12.0104		44.2856	3.68727
	44.9427	3.80075	11.8247		44.9427	3.80075
	53.6637	4.70036	11.4169		53.6637	4.70036
	37.3308	3.32366	11.2318		37.3308	3.32366
	73.5723	6.64732	11.068		73.5723	6.64732
	50.1946	4.60909	10.8904		50.1946	4.60909
	35.9509	3.32366	10.8167		35.9509	3.32366
	29.8561	2.76545	10.7961		29.8561	2.76545
	41.93	3.91094	10.7212		41.93	3.91094
	30.9187	2.91504	10.6066		30.9187	2.91504
	38.7163	3.68727	10.5		38.7163	3.68727
	49.1943	4.70036	10.4661		49.1943	4.70036
	42.0514	4.12249	10.2005		42.0514	4.12249
	59.8259	5.90251	10.1357		59.8259	5.90251
	29.4982	2.91504	10.1193		29.4982	2.91504
	39.1203	3.91094	10.0028		39.1203	3.91094
	28.6209	2.91504	9.81835		28.6209	2.91504
	53.6637	5.6072	9.57051		53.6637	5.6072
	51.9172	5.5309	9.38675		51.9172	5.5309
	36.5603	3.91094	9.3482		36.5603	3.91094
	30.322	3.32366	9.12309		30.322	3.32366
	42.6235	4.70036	9.06812		42.6235	4.70036
	41.2764	4.60909	8.95545		41.2764	4.60909
	18.4363	2.06125	8.94427		18.4363	2.06125
	33.2366	3.80075	8.74475		33.2366	3.80075
	48.1556	5.6072	8.58818		48.1556	5.6072
	39.1962	4.60909	8.50412		39.1962	4.60909
	34.306	4.12249	8.32166		34.306	4.12249
	31.3553	3.80075	8.24978		31.3553	3.80075
	29.6275	3.68727	8.03508		29.6275	3.68727
	30.4339	3.80075	8.00735		30.4339	3.80075
	46.5312	5.83008	7.98123		46.5312	5.83008
	30.0264	3.80075	7.90011		30.0264	3.80075
	30.2379	3.91094	7.73161		30.2379	3.91094
	25.4962	3.32366	7.67112		25.4962	3.32366
	40.4025	5.37507	7.51665		40.4025	5.37507
	62.0089	8.29636	7.47424		62.0089	8.29636
	34.1197	4.60909	7.4027		34.1197	4.60909
	26.8754	3.68727	7.28869		26.8754	3.68727
	37.9292	5.21459	7.27367		37.9292	5.21459
	33.6432	4.70036	7.15757		33.6432	4.70036
	27.6238	3.91094	7.06321		27.6238	3.91094
	32.7343	4.70036	6.96419		32.7343	4.70036
	27.1115	3.91094	6.93221		27.1115	3.91094
	83.3977	12.3675	6.74331		83.3977	12.3675
	30.6426	4.60909	6.64831		30.6426	4.60909
	30.6426	4.60909	6.64831		30.6426	4.60909
	21.7557	3.32366	6.5457		21.7557	3.32366
	24.8207	3.80075	6.53047		24.8207	3.80075
	24.1263	3.80075	6.34776		24.1263	3.80075
	23.9672	3.80075	6.30593		23.9672	3.80075
	30.5454	4.96414	6.15322		30.5454	4.96414
	68.0211	11.1002	6.12795		68.0211	11.1002
	20.3009	3.32366	6.108		20.3009	3.32366
	23.1191	3.80075	6.08276		23.1191	3.80075
	29.7277	4.96414	5.98849		29.7277	4.96414
	27.7159	4.70036	5.89654		27.7159	4.70036
	19.5981	3.32366	5.89654		19.5981	3.32366
	19.5547	3.32366	5.88348		19.5547	3.32366
	31.531	5.6072	5.62331		31.531	5.6072
	21.2218	3.80075	5.58359		21.2218	3.80075
	20.3636	3.68727	5.52268		20.3636	3.68727
	22.2958	4.12249	5.40833		22.2958	4.12249
	14.8639	2.76545	5.37484		14.8639	2.76545
	19.4458	3.68727	5.27376		19.4458	3.68727
	46.0909	8.74513	5.27046		46.0909	8.74513
	27.2365	5.21459	5.22315		27.2365	5.21459
	17.3194	3.32366	5.21094		17.3194	3.32366
	31.8394	6.18374	5.14889		31.8394	6.18374
	16.9975	3.32366	5.11408		16.9975	3.32366
	20.7153	4.12249	5.02494		20.7153	4.12249
	28.9457	5.90251	4.90396		28.9457	5.90251
	22.5044	4.60909	4.88262		22.5044	4.60909
	17.8985	3.68727	4.85412		17.8985	3.68727
	24.0381	4.96414	4.84234		24.0381	4.96414
	21.8531	4.60909	4.74131		21.8531	4.60909
	20.899	4.60909	4.53431		20.899	4.60909
	13.1984	2.91504	4.52769		13.1984	2.91504
	22.4288	4.96414	4.51816		22.4288	4.96414
	21.0207	4.70036	4.47214		21.0207	4.70036
	48.8563	11.1002	4.40141		48.8563	11.1002
	24.4064	5.6072	4.35269		24.4064	5.6072
	19.5547	4.70036	4.16025		19.5547	4.70036
	30.6426	7.43193	4.12311		30.6426	7.43193
	25.4962	6.18374	4.12311		25.4962	6.18374
	19.0038	4.70036	4.04304		19.0038	4.70036
PITS/GOUGES	18.1577	4.60909	3.93954	65.7303
	23.1007	5.90251	3.9137	107.091
	15.8595	4.12249	3.84708	51.35
	27.5005	7.19962	3.81971	155.503
	17.5388	4.70036	3.73136	64.7471
	18.4363	4.96414	3.71391	71.8801
	22.6737	6.18374	3.66667	110.119
	33.3005	9.12553	3.64915	238.67
	25.3122	7.02035	3.60555	139.566
	14.0709	3.91094	3.59784	43.2209
	15.698	4.60909	3.40588	56.8262
	24.3367	7.19962	3.38027	137.613
	19.5981	5.83008	3.36155	89.7385
	15.1189	4.60909	3.28024	54.73
	12.019	3.68727	3.2596	34.8068
	11.805	3.91094	3.01846	36.2608
	25.3625	8.49874	2.98427	169.292
	17.3928	5.90251	2.94668	80.63
	14.5752	4.96414	2.9361	56.8262
	16.9474	5.83008	2.90689	77.6011
	24.5453	8.49874	2.88811	163.837
	16.9474	5.90251	2.87122	78.5651
	20.3009	7.19962	2.81972	114.793
	13.9496	4.96414	2.81008	54.3872
	15.4525	5.6072	2.75583	68.0509
	15.913	5.83008	2.72947	72.8648
	12.8063	4.70036	2.72453	47.2765
	44.4962	16.6183	2.67754	580.763
	8.49874	3.32366	2.55704	22.1851
	9.79905	3.91094	2.50555	30.0992
	13.0365	5.21459	2.5	53.3912
	11.4023	4.60909	2.47386	41.2758
	20.4677	8.29636	2.46707	133.366
	16.6183	7.02035	2.36716	91.6295
	13.8273	5.90251	2.34261	64.1007
	12.9383	5.5309	2.33928	56.2036
	12.5381	5.37507	2.33263	52.9304
	18.1577	7.87601	2.30544	112.32
	21.2218	9.26415	2.29075	154.411
	16.6183	7.43193	2.23607	97.0014
	8.49874	3.80075	2.23607	25.3696
	14.8924	6.71093	2.21913	78.4942
	14.0709	6.51823	2.1587	72.0348
	40.4341	18.8015	2.15058	597.075
	17.7315	8.34741	2.12419	116.249
	14.8639	7.02035	2.11725	81.9559
	26.8754	12.9383	2.07719	273.1
	14.5752	7.02035	2.07614	80.3644
	11.1002	5.37507	2.06512	46.8601
	8.49874	4.12249	2.06155	27.5172
	15.2588	7.43193	2.05314	89.0659
	27.4076	13.4219	2.04201	288.917
	6.71093	3.32366	2.01914	17.5182
	16.9975	8.49874	2	113.456
	7.43193	3.80075	1.95538	22.1851
	14.3992	7.43193	1.93748	84.0487
	19.8566	10.3062	1.92666	160.729
	19.5547	10.3062	1.89737	158.285
	8.69641	4.60909	1.8868	31.4807
	8.49874	4.60909	1.84391	30.7652
	9.12553	4.96414	1.83829	35.5788
	13.0365	7.19962	1.81071	73.7156
	12.019	6.64732	1.8081	62.7488
	12.1246	6.71093	1.8067	63.9058
	10.5103	5.90251	1.78065	48.724
	5.90251	3.32366	1.77591	15.4079
	16.9975	9.62406	1.76614	128.479
	25.4295	14.5752	1.74471	291.1
	13.1984	7.6015	1.73629	78.7972
	30.1957	17.3928	1.7361	412.481
	11.2522	6.51823	1.72627	57.6047
	9.62406	5.6072	1.71638	42.3832
	6.45272	3.80075	1.69775	19.262
	11.805	7.02035	1.68154	65.0902
	11.2522	6.71093	1.6767	59.3076
	11.1384	6.64732	1.67562	58.1511
	11.1002	6.64732	1.66987	57.9516
	39.1311	23.628	1.65613	726.172
	15.2588	9.21817	1.65529	110.473
	9.26415	5.6072	1.65219	40.7982
	14.0407	8.49874	1.65209	93.7202
	10.7501	6.51823	1.64924	55.0344
	10.7501	6.51823	1.64924	55.0344
	20.6125	12.5381	1.64399	202.979
	39.4555	24.1263	1.63538	747.632
	11.7328	7.19962	1.62964	66.3441
	12.019	7.43193	1.61722	70.1553
	7.6015	4.70036	1.61722	28.0621
	7.37454	4.60909	1.6	26.6956
	20.6125	13.0365	1.58114	211.047
	13.4219	8.49874	1.57928	89.5895
	7.37454	4.70036	1.56893	27.2243
	7.19962	4.60909	1.56205	26.0624
	9.21817	5.90251	1.56174	42.7338
	12.2986	7.92977	1.55094	76.5959
	20.7153	13.4219	1.5434	218.37
	7.6015	4.96414	1.53128	29.6369
	21.0409	13.8273	1.52169	228.502
	15.0061	9.92828	1.51145	117.012
	10.14	6.71093	1.51097	53.4454
	12.8394	8.49874	1.51075	85.7018
	12.4018	8.24498	1.50416	80.3089
	8.74513	5.83008	1.5	40.0434
	9.21817	6.18374	1.49071	44.7699
	11.0618	7.43193	1.48842	64.568
	7.92977	5.37507	1.47529	33.4761
	10.5103	7.19962	1.45985	59.4314
	13.8273	9.49069	1.45693	103.068
	5.5309	3.80075	1.45521	16.5103
	10.7501	7.43193	1.44648	62.7488
	6.64732	4.60909	1.44222	24.0631
	16.4125	11.4023	1.43941	146.979
	15.0061	10.4292	1.43886	122.916
	9.26415	6.45272	1.4357	46.9503
	5.90251	4.12249	1.43178	19.1111
	12.4018	8.69641	1.42608	84.7059
	16.4125	11.5503	1.42095	148.888
	7.6015	5.37507	1.41421	32.0903
	18.5512	13.1984	1.40556	192.302
	9.40073	6.71093	1.40081	49.5489
	10.3062	7.43193	1.38675	60.1577
	9.97098	7.19962	1.38493	56.3816
	16.3086	11.805	1.3815	151.208
	7.6015	5.6072	1.35567	33.4761
	24.2492	17.8985	1.35482	340.881
	10.1818	7.6015	1.33945	60.7875
	7.19962	5.37507	1.33945	30.3937
	10.5103	7.87601	1.33447	65.0149
	7.37454	5.5309	1.33333	32.0347
	6.18374	4.70036	1.31559	22.8282
	8.69641	6.64732	1.30826	45.4021
	8.49874	6.51823	1.30384	43.5085
	8.49874	6.51823	1.30384	43.5085
	8.74513	6.71093	1.30312	46.0934
	14.3992	11.1002	1.29721	125.533
	18.2511	14.0709	1.29707	201.698
	10.7896	8.34741	1.29257	70.737
	13.0365	10.14	1.28565	103.821
	8.49874	6.64732	1.27852	44.3701
	5.83008	4.60909	1.26491	21.1047
	12.3675	9.79905	1.26211	95.1821
	9.97098	7.92977	1.25741	62.0995
	6.71093	5.37507	1.24853	28.3307
	6.18374	4.96414	1.24568	24.1093
	4.12249	3.32366	1.24035	10.7613
	21.0207	16.9474	1.24035	279.795
	5.83008	4.70036	1.24035	21.5227
	10.3062	8.34741	1.23466	67.5681
	14.0709	11.4023	1.23405	126.009
	6.71093	5.5309	1.21335	29.152
	6.51823	5.37507	1.21268	27.5172
	6.18374	5.21459	1.18585	25.3257
	11.805	9.97098	1.18394	92.4473
	11.7328	9.92828	1.18176	91.4884
	8.49874	7.19962	1.18044	48.0567
	8.49874	7.19962	1.18044	48.0567
	8.24498	7.02035	1.17444	45.461
	10.7896	9.21817	1.17047	78.116
	7.6015	6.51823	1.16619	38.9152
	11.9836	10.5103	1.14018	98.9224
	4.70036	4.12249	1.14018	15.2188
	7.43193	6.51823	1.14018	38.0471
	9.49069	8.34741	1.13696	62.2214
	5.90251	5.21459	1.13192	24.1739
	9.79905	8.69641	1.12679	66.9289
	5.83008	5.21459	1.11803	23.8773
	8.49874	7.6015	1.11803	50.7392
	8.74513	7.87601	1.11035	54.0956
	6.51823	5.90251	1.10432	30.2174
	6.18374	5.6072	1.10282	27.2324
	10.5103	9.62406	1.09209	79.4446
	13.1984	12.1246	1.08856	125.684
	5.83008	5.37507	1.08465	24.6121
	5.37507	4.96414	1.08278	20.9565
	9.92828	9.21817	1.07703	71.8801
	4.96414	4.60909	1.07703	17.97
	4.96414	4.60909	1.07703	17.97
	7.02035	6.51823	1.07703	35.94
	19.0038	17.7075	1.0732	264.294
	10.5103	9.79905	1.07259	80.8892
	10.4292	9.79905	1.0643	80.2646
	14.7779	13.9496	1.05937	161.906
	11.805	11.2522	1.04913	104.327
	6.18374	5.90251	1.04765	28.6667
	13.1015	12.5381	1.04494	129.015
	37.1596	35.5826	1.04432	1038.48
	7.92977	7.6015	1.04319	47.3424
	8.24498	7.92977	1.03975	51.35
	9.79905	9.49069	1.03249	73.0418
	8.49874	8.24498	1.03078	55.0344
	8.49874	8.24498	1.03078	55.0344
	5.37507	5.21459	1.03078	22.0138
	8.49874	8.24498	1.03078	55.0344
	4.70036	4.60909	1.0198	17.0152
	5.90251	5.83008	1.01242	27.0272
	4.60909	4.60909	1	16.6847
	5.5309	5.5309	1	24.026
	9.21817	9.21817	1	66.739
	4.60909	4.60909	1	16.6847
	5.90251	5.90251	1	27.363
	7.37454	7.37454	1	42.7129
	4.96414	4.96414	1	19.3543
	7.43193	7.43193	1	43.3803

## Sheet: DicraeosaurusMB.R2204Enamel
	L1	L2	Ratio	Area	Scratch Length	Scratch Breadth
SCRATCHES	113.742	1.30428	87.2067		113.742	1.30428
	107.443	2.06225	52.0999		107.443	2.06225
	89.7827	1.84454	48.6749		89.7827	1.84454
	129.345	2.91647	44.3497		129.345	2.91647
	113.813	3.32528	34.2266		113.813	3.32528
	194.17	5.9054	32.88		194.17	5.9054
	90.1561	2.91647	30.9128		90.1561	2.91647
	101.868	3.32528	30.6343		101.868	3.32528
	97.1889	3.32528	29.2272		97.1889	3.32528
	77.146	2.7668	27.8827		77.146	2.7668
	50.7247	1.84454	27.5		50.7247	1.84454
	110.768	4.12451	26.8561		110.768	4.12451
	82.5417	3.32528	24.8224		82.5417	3.32528
	95.7961	4.12451	23.2261		95.7961	4.12451
	89.631	3.91285	22.9068		89.631	3.91285
	94.4368	4.12451	22.8965		94.4368	4.12451
	57.7431	2.60857	22.1359		57.7431	2.60857
	109.377	4.96657	22.0227		109.377	4.96657
	60.6808	2.91647	20.8062		60.6808	2.91647
	77.6569	3.91285	19.8466		77.6569	3.91285
	105.679	5.3777	19.6514		105.679	5.3777
	4.12451	80.0888	19.4178		80.0888	4.12451
	106.637	5.60994	19.0085		106.637	5.60994
	52.2365	2.7668	18.8797		52.2365	2.7668
	77.6296	4.12451	18.8215		77.6296	4.12451
	121.551	7.20314	16.8747		121.551	7.20314
	67.7851	4.12451	16.4347		67.7851	4.12451
	53.8718	3.32528	16.2007		53.8718	3.32528
	45.1158	2.91647	15.4693		45.1158	2.91647
	30.7131	2.06225	14.893		30.7131	2.06225
	76.997	5.3777	14.3178		76.997	5.3777
	5.21714	74.6069	14.3003		74.6069	5.21714
	47.2792	3.32528	14.2181		47.2792	3.32528
	78.9496	5.60994	14.0732		78.9496	5.60994
	64.8742	4.61134	14.0684		64.8742	4.61134
	51.4242	3.80261	13.5234		51.4242	3.80261
	39.0088	2.91647	13.3754		39.0088	2.91647
	95.7073	7.20314	13.2869		95.7073	7.20314
	61.9775	4.70266	13.1792		61.9775	4.70266
	53.7216	4.12451	13.025		53.7216	4.12451
	59.8054	4.61134	12.9692		59.8054	4.61134
	35.3122	2.7668	12.7628		35.3122	2.7668
	4.12451	52.3179	12.6846		52.3179	4.12451
	107.416	8.50289	12.6328		107.416	8.50289
	57.5143	4.61134	12.4724		57.5143	4.61134
	48.3554	3.91285	12.3581		48.3554	3.91285
	71.783	5.83294	12.3065		71.783	5.83294
	50.1938	4.12451	12.1696		50.1938	4.12451
	78.257	6.45588	12.1218		78.257	6.45588
	55.719	4.61134	12.083		55.719	4.61134
	33.2017	2.7668	12		33.2017	2.7668
	56.3264	4.70266	11.9775		56.3264	4.70266
	2.06225	24.2084	11.7388		24.2084	2.06225
	38.3823	3.32528	11.5426		38.3823	3.32528
	45.0403	3.91285	11.5109		45.0403	3.91285
	56.8225	4.96657	11.441		56.8225	4.96657
	37.9813	3.32528	11.422		37.9813	3.32528
	75.901	6.65057	11.4127		75.901	6.65057
	101.454	9.22268	11.0005		101.454	9.22268
	51.2502	4.70266	10.8981		51.2502	4.70266
	4.61134	50.1768	10.8812		50.1768	4.61134
	50.8671	4.70266	10.8167		50.8671	4.70266
	35.6	3.32528	10.7059		35.6	3.32528
	56.4621	5.3777	10.4993		56.4621	5.3777
	57.0093	5.60994	10.1622		57.0093	5.60994
	50.2192	4.96657	10.1114		50.2192	4.96657
	41.5021	4.12451	10.0623		41.5021	4.12451
	52.3179	5.21714	10.0281		52.3179	5.21714
	64.5588	6.45588	10		64.5588	6.45588
	50.9339	5.21714	9.76281		50.9339	5.21714
	39.6039	4.12451	9.60208		39.6039	4.12451
	31.5464	3.32528	9.48683		31.5464	3.32528
	34.717	3.68907	9.41077		34.717	3.68907
	81.7132	8.70066	9.39161		81.7132	8.70066
	43.9991	4.70266	9.3562		43.9991	4.70266
	66.7228	7.20314	9.26301		66.7228	7.20314
	30.6992	3.32528	9.23205		30.6992	3.32528
	19.013	2.06225	9.21954		19.013	2.06225
	50.9339	5.53361	9.20447		50.9339	5.53361
	90.2316	9.80384	9.20369		90.2316	9.80384
	51.0174	5.60994	9.0941		51.0174	5.60994
	30.1117	3.32528	9.05539		30.1117	3.32528
	29.6993	3.32528	8.93136		29.6993	3.32528
	75.4289	8.50289	8.87097		75.4289	8.50289
	40.6217	4.61134	8.80909		40.6217	4.61134
	22.9087	2.60857	8.78208		22.9087	2.60857
	34.3228	3.91285	8.7718		34.3228	3.91285
	39.3237	4.61134	8.5276		39.3237	4.61134
	6.45588	55.0278	8.52368		55.0278	6.45588
	45.0403	5.3777	8.37538		45.0403	5.3777
	63.6632	7.60522	8.37099		63.6632	7.60522
	21.5897	2.60857	8.27647		21.5897	2.60857
	64.0097	7.8257	8.17941		64.0097	7.8257
	36.7174	4.61134	7.96241		36.7174	4.61134
	46.4442	5.9054	7.86471		46.4442	5.9054
	45.4164	5.83294	7.78621		45.4164	5.83294
	50.2192	6.45588	7.77883		50.2192	6.45588
	21.3918	2.7668	7.73161		21.3918	2.7668
	47.6466	6.18676	7.70137		47.6466	6.18676
	41.1315	5.3777	7.64853		41.1315	5.3777
	49.1924	6.45588	7.61979		49.1924	6.45588
	28.8716	3.80261	7.59257		28.8716	3.80261
	46.9542	6.18676	7.58947		46.9542	6.18676
	35.6358	4.70266	7.5778		35.6358	4.70266
	27.7448	3.68907	7.5208		27.7448	3.68907
	34.766	4.70266	7.39282		34.766	4.70266
	34.0116	4.61134	7.37564		34.0116	4.61134
	58.0736	7.93365	7.31991		58.0736	7.93365
	13.3011	1.84454	7.2111		13.3011	1.84454
	42.3139	5.9054	7.1653		42.3139	5.9054
	32.7113	4.61134	7.09366		32.7113	4.61134
	27.421	3.91285	7.00793		27.421	3.91285
	28.7239	4.12451	6.96419		28.7239	4.12451
	50.8001	7.43556	6.83205		50.8001	7.43556
	25.6914	3.80261	6.75626		25.6914	3.80261
	40.5169	6.18676	6.54896		40.5169	6.18676
	30.0269	4.61134	6.51153		30.0269	4.61134
	35.6	5.53361	6.43342		35.6	5.53361
	43.1795	6.71421	6.43106		43.1795	6.71421
	42.7936	6.71421	6.37359		42.7936	6.71421
	49.64	7.87986	6.2996		49.64	7.87986
	30.7131	4.96657	6.18396		30.7131	4.96657
	4.61134	28.0951	6.09262		28.0951	4.61134
	57.7726	9.49533	6.08431		57.7726	9.49533
	23.801	3.91285	6.08276		23.801	3.91285
	23.0567	3.80261	6.06339		23.0567	3.80261
	39.3993	6.71421	5.86805		39.3993	6.71421
	31.4113	5.3777	5.84103		31.4113	5.3777
	2.06225	12.0249	5.83095		12.0249	2.06225
	21.4514	3.68907	5.81485		21.4514	3.68907
	37.4514	6.45588	5.80113		37.4514	6.45588
	31.8416	5.53361	5.75423		31.8416	5.53361
	31.8416	5.53361	5.75423		31.8416	5.53361
	19.013	3.32528	5.71772		19.013	3.32528
	5.60994	31.5194	5.6185		31.5194	5.60994
	16.3166	2.91647	5.59464		16.3166	2.91647
	27.668	4.96657	5.57086		27.668	4.96657
	6.52142	35.9211	5.50818		35.9211	6.52142
	30.8236	5.60994	5.49447		30.8236	5.60994
	27.1247	4.96657	5.46146		27.1247	4.96657
	3.32528	18.1197	5.44906		18.1197	3.32528
	35.8737	6.65057	5.39409		35.8737	6.65057
	5.3777	28.6498	5.32751		28.6498	5.3777
	35.0583	6.71421	5.22151		35.0583	6.71421
	38.7792	7.43556	5.21536		38.7792	7.43556
	37.2235	7.20314	5.16768		37.2235	7.20314
	19.013	3.68907	5.15388		19.013	3.68907
	24.2084	4.70266	5.14782		24.2084	4.70266
	21.2322	4.12451	5.14782		21.2322	4.12451
	31.7346	6.18676	5.12944		31.7346	6.18676
	3.80261	19.3676	5.09325		19.3676	3.80261
	20.9093	4.12451	5.06952		20.9093	4.12451
	27.806	5.53361	5.02494		27.806	5.53361
	23.1304	4.61134	5.01597		23.1304	4.61134
	18.4454	3.68907	5		18.4454	3.68907
	39.0088	7.87986	4.95044		39.0088	7.87986
	6.52142	32.1209	4.92544		32.1209	6.52142
	22.4398	4.61134	4.86621		22.4398	4.61134
	26.7617	5.53361	4.83621		26.7617	5.53361
	37.8467	7.87986	4.80297		37.8467	7.87986
	19.7158	4.12451	4.78017		19.7158	4.12451
	18.6745	3.91285	4.77261		18.6745	3.91285
	5.60994	26.7458	4.76757		26.7458	5.60994
	3.68907	17.4988	4.74342		17.4988	3.68907
	20.7254	4.61134	4.49444		20.7254	4.61134
	28.9598	6.45588	4.48581		28.9598	6.45588
	34.8637	7.93365	4.39441		34.8637	7.93365
	39.786	9.08329	4.38013		39.786	9.08329
	37.1778	8.50289	4.37237		37.1778	8.50289
	20.1426	4.70266	4.28324		20.1426	4.70266
	19.7374	4.61134	4.28019		19.7374	4.61134
	23.2221	5.53361	4.19656		23.2221	5.53361
	32.4895	7.8257	4.15164		32.4895	7.8257
	27.5139	6.65057	4.13707		27.5139	6.65057
	32.1738	7.87986	4.08304		32.1738	7.87986
	24.8328	6.18676	4.01386		24.8328	6.18676
PITS/GOUGES	31.3707	7.87986	3.98112	194.148
	32.7503	8.35149	3.92149	214.817
	22.7783	5.83294	3.90512	104.352
	16.1067	4.12451	3.90512	52.1758
	10.7949	2.7668	3.90157	23.4577
	26.7458	7.02378	3.80789	147.542
	25.3246	6.71421	3.77179	133.545
	4.96657	18.4454	3.71391	71.9504
	3.68907	12.9118	3.5	37.4104
	10.1449	35.4804	3.49734	282.701
	22.1536	6.52142	3.39706	113.469
	6.45588	21.6094	3.34725	109.569
	19.6077	5.9054	3.3203	90.9422
	20.4153	6.18676	3.29983	99.1993
	19.1912	5.83294	3.29014	87.9181
	2.06225	6.71421	3.25576	10.8749
	22.8343	7.20314	3.17004	129.181
	17.4988	5.53361	3.16228	76.0513
	17.4013	5.53361	3.14466	75.6276
	5.53361	17.4013	3.14466	75.6276
	24.5573	7.8257	3.13803	150.936
	4.96657	15.46	3.11282	60.3054
	18.3065	5.9054	3.09996	84.9072
	34.0116	11.0672	3.07318	295.634
	12.5442	4.12451	3.04138	40.6355
	15.0134	4.96657	3.0229	58.5634
	16.6264	5.60994	2.96374	73.2566
	16.4205	5.60994	2.92704	72.3494
	5.21714	15.0134	2.87772	61.518
	3.91285	11.1056	2.83823	34.1291
	15.7057	5.53361	2.83823	68.2582
	3.32528	9.40533	2.82843	24.5636
	7.93365	22.1728	2.79478	138.161
	18.1666	6.52142	2.78568	93.0476
	18.1197	6.52142	2.77849	92.8075
	34.2732	12.3735	2.76988	333.071
	10.1449	3.68907	2.75	29.3939
	17.7402	6.52142	2.72029	90.8636
	21.2922	7.87986	2.7021	131.774
	11.9895	4.61134	2.6	43.4228
	11.9895	4.70266	2.54951	44.2827
	18.4454	7.37814	2.5	106.887
	7.87986	19.6077	2.48833	121.349
	3.80261	9.22268	2.42536	27.5441
	13.0428	5.3777	2.42536	55.0882
	3.80261	9.08329	2.3887	27.1278
	12.8126	5.3777	2.38253	54.1156
	5.53361	12.9118	2.33333	56.1156
	2.7668	6.45588	2.33333	14.0289
	25.8893	11.2199	2.30745	228.138
	14.7851	6.45588	2.29017	74.9668
	6.71421	15.3496	2.28614	80.9435
	4.61134	10.5155	2.28035	38.0843
	6.52142	14.7563	2.26274	75.5804
	3.68907	8.30041	2.25	24.0495
	4.61134	10.3113	2.23607	37.3447
	3.91285	8.70066	2.22361	26.7384
	18.3065	8.24902	2.21923	118.603
	24.4183	11.0672	2.20637	212.248
	14.7563	6.71421	2.19777	77.8148
	5.53361	12.1305	2.19216	52.7204
	3.80261	8.30041	2.18282	24.7897
	7.43556	16.1331	2.16972	94.2153
	11.6659	5.3777	2.1693	49.2724
	5.53361	11.9895	2.16667	52.1073
	4.61134	9.93313	2.15407	35.9752
	7.43556	15.7867	2.12313	92.1923
	8.7494	18.4454	2.10819	126.752
	4.61134	9.62876	2.08806	34.8729
	6.18676	12.8126	2.07096	62.2571
	13.2049	26.7458	2.02545	277.383
	4.61134	9.22268	2	33.4021
	3.68907	7.37814	2	21.3774
	8.24902	4.12451	2	26.7217
	4.61134	9.22268	2	33.4021
	11.0672	5.53361	2	48.0991
	3.68907	7.37814	2	21.3774
	11.0672	21.9221	1.98081	190.55
	18.19	9.22268	1.97231	131.759
	4.70266	9.22268	1.96116	34.0636
	4.70266	9.22268	1.96116	34.0636
	5.53361	10.7949	1.95078	46.9154
	6.18676	12.0249	1.94365	58.4299
	6.45588	3.32528	1.94145	16.8606
	6.71421	12.9446	1.92795	68.2614
	6.65057	12.5442	1.88618	65.5227
	12.4078	6.65057	1.86568	64.8105
	5.53361	10.3113	1.86339	44.8137
	6.52142	12.1305	1.86011	62.1316
	6.45588	11.9895	1.85714	60.7919
	6.45588	11.9895	1.85714	60.7919
	6.52142	12.0249	1.84391	61.5905
	4.61134	8.50289	1.84391	30.7953
	9.97585	18.1666	1.82105	142.335
	13.834	7.60522	1.81902	82.6323
	12.9118	23.35	1.80843	236.789
	10.1449	5.60994	1.80839	44.699
	4.61134	8.30041	1.8	30.0619
	9.62876	5.3777	1.7905	40.6684
	3.32528	5.83294	1.75412	15.2337
	6.45588	3.68907	1.75	18.7052
	6.45588	11.0672	1.71429	56.1156
	120.873	205.699	1.70177	19527.8
	7.87986	13.2049	1.67577	81.7227
	6.65057	11.1438	1.67562	58.208
	4.96657	8.30041	1.67126	32.3777
	4.61134	2.7668	1.66667	10.0206
	9.22268	5.53361	1.66667	40.0826
	9.22268	5.60994	1.64399	40.6355
	13.4284	8.30041	1.6178	87.5416
	7.43556	11.9895	1.61245	70.0171
	6.52142	10.5155	1.61245	53.8593
	4.70266	2.91647	1.61245	10.7719
	4.61134	7.37814	1.6	26.7217
	24.9183	15.6786	1.58932	306.842
	7.60522	11.9895	1.57648	71.6147
	15.2104	23.979	1.57648	286.459
	7.43556	11.6659	1.56893	68.1273
	8.50289	12.9118	1.51851	86.2267
	18.1666	11.9895	1.51521	171.066
	12.5442	8.35149	1.50203	82.2805
	3.68907	5.53361	1.5	16.033
	5.53361	8.30041	1.5	36.0743
	7.37814	11.0672	1.5	64.1321
	16.6008	11.0672	1.5	144.297
	5.53361	8.30041	1.5	36.0743
	5.53361	8.30041	1.5	36.0743
	7.43556	11.1438	1.49872	65.0785
	6.45588	9.62876	1.49147	48.822
	8.30041	5.60994	1.47959	36.5719
	9.93313	6.71421	1.47942	52.3807
	9.62876	6.52142	1.47648	49.3177
	8.24902	5.60994	1.47043	36.3455
	7.02378	10.3113	1.46805	56.8818
	6.71421	4.61134	1.45602	24.3171
	6.52142	9.26868	1.42127	47.4734
	4.61134	6.45588	1.4	23.3815
	4.61134	6.45588	1.4	23.3815
	4.61134	6.45588	1.4	23.3815
	4.61134	6.45588	1.4	23.3815
	4.61134	6.45588	1.4	23.3815
	12.0249	16.6008	1.38054	156.784
	6.45588	4.70266	1.37281	23.8445
	5.83294	7.93365	1.36015	36.3455
	6.52142	8.7494	1.34164	44.8137
	3.68907	2.7668	1.33333	8.01651
	29.527	22.3067	1.32368	517.302
	17.5473	23.0751	1.31502	318.014
	9.26868	12.1305	1.30877	88.3056
	2.91647	3.80261	1.30384	8.71021
	9.22268	11.9895	1.3	86.8456
	10.3113	7.93365	1.29969	64.2503
	6.45588	8.35149	1.29363	42.3457
	9.26868	11.9895	1.29355	87.2787
	9.49533	7.37814	1.28695	55.0234
	6.45588	8.30041	1.28571	42.0867
	6.45588	8.30041	1.28571	42.0867
	6.45588	8.30041	1.28571	42.0867
	6.45588	8.30041	1.28571	42.0867
	12.9446	16.6264	1.28442	169.036
	10.1449	12.9118	1.27273	102.879
	5.53361	7.02378	1.2693	30.526
	10.1868	12.9118	1.2675	103.303
	8.30041	10.5155	1.26686	68.5517
	9.97585	12.5442	1.25746	98.2841
	4.96657	6.18676	1.24568	24.1329
	7.60522	9.40533	1.23669	56.1792
	22.6848	18.5603	1.22222	330.681
	5.53361	6.71421	1.21335	29.1805
	6.71421	5.53361	1.21335	29.1805
	5.53361	6.71421	1.21335	29.1805
	10.1449	12.3046	1.21288	98.0408
	5.3777	6.52142	1.21268	27.5441
	15.9208	13.2049	1.20568	165.116
	5.3777	6.45588	1.20049	27.2673
	4.61134	5.53361	1.2	20.0413
	4.61134	5.53361	1.2	20.0413
	4.70266	5.60994	1.19293	20.7201
	6.65057	5.60994	1.1855	29.3026
	7.87986	6.65057	1.18484	41.1592
	4.70266	5.53361	1.1767	20.4382
	9.26868	7.87986	1.17625	57.3623
	6.45588	5.53361	1.16667	28.0578
	5.53361	6.45588	1.16667	28.0578
	5.53361	6.45588	1.16667	28.0578
	6.45588	5.53361	1.16667	28.0578
	5.53361	6.45588	1.16667	28.0578
	8.35149	9.62876	1.15294	63.1574
	6.45588	7.43556	1.15175	37.7015
	5.60994	6.45588	1.15079	28.4448
	9.40533	8.30041	1.13312	61.3145
	15.7057	13.8647	1.13278	171.024
	8.35149	7.37814	1.13192	48.3951
	6.52142	7.37814	1.13137	37.7902
	6.52142	7.37814	1.13137	37.7902
	8.24902	9.26868	1.12361	60.0496
	7.60522	8.50289	1.11803	50.7888
	16.6008	18.5374	1.11665	241.695
	8.30041	7.43556	1.11631	48.4734
	8.30041	9.22268	1.11111	60.1239
	9.22268	8.30041	1.11111	60.1239
	9.22268	8.30041	1.11111	60.1239
	9.26868	10.1868	1.09905	74.1558
	14.3471	13.2049	1.0865	148.795
	9.22268	8.50289	1.08465	61.5905
	4.96657	4.61134	1.07703	17.9876
	9.12999	8.50289	1.07375	60.9715
	8.30041	8.7494	1.05409	57.0385
	5.83294	5.53361	1.05409	25.3504
	5.60994	5.3777	1.04319	23.6943
	5.60994	5.83294	1.03975	25.7001
	20.2899	19.6077	1.03479	312.461
	9.08329	9.26868	1.02041	66.1227
	14.3175	14.108	1.01485	158.643
	6.45588	6.52142	1.01015	33.0664
	6.71421	6.65057	1.00957	35.0707
	7.37814	7.43556	1.00778	43.0875
	9.08329	9.12999	1.00514	65.1333
	10.1868	10.1449	1.00412	81.1665
	9.22268	9.22268	1	66.8043
	5.53361	5.53361	1	24.0495
	7.37814	7.37814	1	42.7547
	5.53361	5.53361	1	24.0495
	6.45588	6.45588	1	32.7341
	5.53361	5.53361	1	24.0495
	8.30041	8.30041	1	54.1115
	4.61134	4.61134	1	16.7011
	6.45588	6.45588	1	32.7341

## Sheet: DicraeosaurusMB.R2204Dentine
	L1	L2	Ratio	Area	Scratch Length	Scratch Breadth
SCRATCHES	254.111	1.83818	138.241		254.111	1.83818
	164.643	1.29979	126.669		164.643	1.29979
	144.133	1.29979	110.89		144.133	1.29979
	97.7266	0.91909	106.33		97.7266	0.91909
	96.2064	0.91909	104.676		96.2064	0.91909
	285.748	2.90642	98.3163		285.748	2.90642
	83.5766	0.91909	90.934		83.5766	0.91909
	152.613	1.83818	83.0241		152.613	1.83818
	223.694	2.90642	76.9656		223.694	2.90642
	3.67636	260.675	70.9057		260.675	3.67636
	63.9412	0.91909	69.5701		63.9412	0.91909
	3.67636	235.949	64.1799		235.949	3.67636
	217.304	3.67636	59.1085		217.304	3.67636
	113.882	2.05515	55.413		113.882	2.05515
	199.745	3.78951	52.7101		199.745	3.78951
	142.613	2.90642	49.0683		142.613	2.90642
	62.6062	1.29979	48.1664		62.6062	1.29979
	172.945	3.78951	45.638		172.945	3.78951
	81.099	1.83818	44.1192		81.099	1.83818
	112.359	2.59958	43.2218		112.359	2.59958
	53.0372	1.29979	40.8044		53.0372	1.29979
	52.0647	1.29979	40.0562		52.0647	1.29979
	211.6	5.35917	39.4838		211.6	5.35917
	79.0257	2.05515	38.4526		79.0257	2.05515
	106.71	2.90642	36.7151		106.71	2.90642
	133.724	3.67636	36.3739		133.724	3.67636
	103.678	2.90642	35.6721		103.678	2.90642
	72.3984	2.05515	35.2278		72.3984	2.05515
	130.073	4.1103	31.6457		130.073	4.1103
	89.3032	2.90642	30.7262		89.3032	2.90642
	61.5859	2.05515	29.9666		61.5859	2.05515
	54.0391	1.83818	29.3981		54.0391	1.83818
	54.0391	1.83818	29.3981		54.0391	1.83818
	85.1586	2.90642	29.3002		85.1586	2.90642
	76.1016	2.59958	29.2746		76.1016	2.59958
	58.5411	2.05515	28.4851		58.5411	2.05515
	5.59061	156.418	27.9788		156.418	5.59061
	55.527	2.05515	27.0185		55.527	2.05515
	49.4945	1.83818	26.9258		49.4945	1.83818
	73.7395	2.75727	26.7436		73.7395	2.75727
	83.1256	3.31383	25.0845		83.1256	3.31383
	63.7891	2.59958	24.5382		63.7891	2.59958
	3.78951	92.6505	24.4492		92.6505	3.78951
	49.8177	2.05515	24.2405		49.8177	2.05515
	79.9186	3.31383	24.1167		79.9186	3.31383
	44.1929	1.83818	24.0416		44.1929	1.83818
	79.5531	3.31383	24.0064		79.5531	3.31383
	43.3144	1.83818	23.5637		43.3144	1.83818
	107.914	4.59545	23.4828		107.914	4.59545
	65.8995	2.90642	22.6738		65.8995	2.90642
	104.068	4.59545	22.646		104.068	4.59545
	73.9225	3.31383	22.3073		73.9225	3.31383
	86.7312	3.89937	22.2424		86.7312	3.89937
	57.5808	2.59958	22.1501		57.5808	2.59958
	42.8931	2.05515	20.871		42.8931	2.05515
	3.78951	78.6883	20.7648		78.6883	3.78951
	68.7416	3.31383	20.7439		68.7416	3.31383
	42.4974	2.05515	20.6785		42.4974	2.05515
	42.1681	2.05515	20.5183		42.1681	2.05515
	79.0898	3.89937	20.2827		79.0898	3.89937
	92.9554	4.59545	20.2277		92.9554	4.59545
	41.3999	2.05515	20.1445		41.3999	2.05515
	40.0411	2.05515	19.4833		40.0411	2.05515
	39.819	2.05515	19.3752		39.819	2.05515
	70.4529	3.67636	19.1638		70.4529	3.67636
	39.1019	2.05515	19.0263		39.1019	2.05515
	88.0506	4.68646	18.7883		88.0506	4.68646
	2.59958	47.6688	18.3371		47.6688	2.59958
	50.3826	2.75727	18.2726		50.3826	2.75727
	120.769	6.69108	18.0492		120.769	6.69108
	73.3547	4.1103	17.8466		73.3547	4.1103
	72.8346	4.1103	17.72		72.8346	4.1103
	45.9545	2.59958	17.6777		45.9545	2.59958
	81.6285	4.68646	17.4179		81.6285	4.68646
	50.0039	2.90642	17.2047		50.0039	2.90642
	48.7118	2.90642	16.7601		48.7118	2.90642
	53.9765	3.31383	16.2883		53.9765	3.31383
	3.67636	59.7409	16.25		59.7409	3.67636
	29.597	1.83818	16.1012		29.597	1.83818
	43.5769	2.75727	15.8044		43.5769	2.75727
	91.5637	5.81284	15.752		91.5637	5.81284
	45.3997	2.90642	15.6205		45.3997	2.90642
	56.4324	3.67636	15.3501		56.4324	3.67636
	27.9077	1.83818	15.1822		27.9077	1.83818
	3.31383	50.0208	15.0946		50.0208	3.31383
	49.8177	3.31383	15.0333		49.8177	3.31383
	43.3534	2.90642	14.9164		43.3534	2.90642
	38.6127	2.59958	14.8535		38.6127	2.59958
	37.0497	2.59958	14.2522		37.0497	2.59958
	38.9937	2.75727	14.1421		38.9937	2.75727
	72.229	5.19916	13.8924		72.229	5.19916
	2.90642	39.9038	13.7295		39.9038	2.90642
	49.4945	3.78951	13.0609		49.4945	3.78951
	37.6939	2.90642	12.9692		37.6939	2.90642
	37.6827	2.90642	12.9653		37.6827	2.90642
	66.835	5.19916	12.855		66.835	5.19916
	37.3223	2.90642	12.8413		37.3223	2.90642
	26.3348	2.05515	12.8141		26.3348	2.05515
	33.151	2.59958	12.7525		33.151	2.59958
	88.7529	6.99958	12.6797		88.7529	6.99958
	41.927	3.31383	12.6522		41.927	3.31383
	25.7509	2.05515	12.53		25.7509	2.05515
	4.1103	50.6918	12.3329		50.6918	4.1103
	31.9045	2.59958	12.2729		31.9045	2.59958
	40.3144	3.31383	12.1655		40.3144	3.31383
	35.2265	2.90642	12.1202		35.2265	2.90642
	39.9461	3.31383	12.0544		39.9461	3.31383
	39.2636	3.31383	11.8484		39.2636	3.31383
	54.3508	4.59545	11.8271		54.3508	4.59545
	32.1682	2.75727	11.6667		32.1682	2.75727
	23.4863	2.05515	11.428		23.4863	2.05515
	59.194	5.19916	11.3853		59.194	5.19916
	4.1103	46.693	11.36		46.693	4.1103
	29.2525	2.59958	11.2528		29.2525	2.59958
	3.31383	37.1863	11.2215		37.1863	3.31383
	2.05515	22.9773	11.1803		22.9773	2.05515
	31.652	2.90642	10.8904		31.652	2.90642
	36.0326	3.31383	10.8734		36.0326	3.31383
	31.4377	2.90642	10.8167		31.4377	2.90642
	31.4108	2.90642	10.8074		31.4108	2.90642
	2.59958	27.2801	10.494		27.2801	2.59958
	34.4138	3.31383	10.3849		34.4138	3.31383
	51.1563	4.94945	10.3357		51.1563	4.94945
	2.59958	26.7169	10.2774		26.7169	2.59958
	33.7945	3.31383	10.198		33.7945	3.31383
	29.597	2.90642	10.1833		29.597	2.90642
	40.9898	4.1103	9.97246		40.9898	4.1103
	38.6455	3.89937	9.91071		38.6455	3.89937
	40.4817	4.1103	9.84886		40.4817	4.1103
	37.243	3.78951	9.82793		37.243	3.78951
	5.81284	57.1021	9.82344		57.1021	5.81284
	32.4947	3.31383	9.80581		32.4947	3.31383
	40.0411	4.1103	9.74166		40.0411	4.1103
	26.7643	2.75727	9.70681		26.7643	2.75727
	31.4377	3.31383	9.48683		31.4377	3.31383
	46.8646	4.94945	9.46864		46.8646	4.94945
	31.195	3.31383	9.41357		31.195	3.31383
	60.4787	6.43363	9.40039		60.4787	6.43363
	12.2622	111.952	9.12984		111.952	12.2622
	26.5106	2.90642	9.1214		26.5106	2.90642
	33.2909	3.67636	9.05539		33.2909	3.67636
	23.5402	2.59958	9.05539		23.5402	2.59958
	40.7935	4.59545	8.87694		40.7935	4.59545
	23.0507	2.59958	8.86707		23.0507	2.59958
	5.59061	49.2636	8.81185		49.2636	5.59061
	47.1611	5.35917	8.80007		47.1611	5.35917
	47.1611	5.35917	8.80007		47.1611	5.35917
	22.737	2.59958	8.74643		22.737	2.59958
	46.1013	5.35917	8.60233		46.1013	5.35917
	17.6791	2.05515	8.60233		17.6791	2.05515
	33.1383	3.89937	8.49837		33.1383	3.89937
	32.0629	3.78951	8.46098		32.0629	3.78951
	32.9465	3.89937	8.44919		32.9465	3.89937
	1.83818	15.2967	8.32166		15.2967	1.83818
	2.59958	21.4367	8.24621		21.4367	2.59958
	23.6297	2.90642	8.13019		23.6297	2.90642
	23.4863	2.90642	8.08084		23.4863	2.90642
	37.0953	4.59545	8.07217		37.0953	4.59545
	30.882	3.89937	7.91974		30.882	3.89937
	22.8297	2.90642	7.85493		22.8297	2.90642
	25.4872	3.31383	7.69115		25.4872	3.31383
	49.8177	6.49895	7.66551		49.8177	6.49895
	29.8244	3.89937	7.64853		29.8244	3.89937
	42.1681	5.51454	7.64671		42.1681	5.51454
	20.9585	2.75727	7.60117		20.9585	2.75727
	27.7863	3.89937	7.12585		27.7863	3.89937
	3.31383	23.5402	7.10363		23.5402	3.31383
	3.31383	23.4323	7.07107		23.4323	3.31383
	3.31383	23.4323	7.07107		23.4323	3.31383
	28.5066	4.1103	6.93542		28.5066	4.1103
	20.1572	2.90642	6.93542		20.1572	2.90642
	10.1517	69.0725	6.80405		69.0725	10.1517
	25.3542	3.78951	6.69064		25.3542	3.78951
	30.6072	4.59545	6.66033		30.6072	4.59545
	30.1063	4.59545	6.55134		30.1063	4.59545
	32.3776	4.94945	6.54164		32.3776	4.94945
	30.008	4.59545	6.52993		30.008	4.59545
	4.94945	32.2861	6.52317		32.2861	4.94945
	30.552	4.68646	6.5192		30.552	4.68646
	4.59545	29.4252	6.40312		29.4252	4.59545
	2.05515	13.1594	6.40312		13.1594	2.05515
	31.3031	4.94945	6.32456		31.3031	4.94945
	16.5691	101.154	6.10498		101.154	16.5691
	24.8834	4.1103	6.05392		24.8834	4.1103
	6.69108	40.4817	6.05011		40.4817	6.69108
	5.51454	33.3035	6.03922		33.3035	5.51454
	22.8297	3.78951	6.02446		22.8297	3.78951
	24.7473	4.1103	6.0208		24.7473	4.1103
	6.62765	39.0478	5.89165		39.0478	6.62765
	19.4968	3.31383	5.88348		19.4968	3.31383
	19.4752	3.31383	5.87694		19.4752	3.31383
	23.9669	4.1103	5.83095		23.9669	4.1103
	14.9617	2.59958	5.75543		14.9617	2.59958
	5.88505	33.7069	5.72755		33.7069	5.88505
	2.90642	16.5691	5.70088		16.5691	2.90642
	14.8199	2.59958	5.70088		14.8199	2.59958
	27.953	4.94945	5.6477		27.953	4.94945
	15.4068	2.75727	5.58768		15.4068	2.75727
	21.6913	3.89937	5.56277		21.6913	3.89937
	2.90642	16.0512	5.52268		16.0512	2.90642
	18.2434	3.31383	5.50524		18.2434	3.31383
	25.2374	4.59545	5.49181		25.2374	4.59545
	15.4068	2.90642	5.30094		15.4068	2.90642
	30.3856	5.81284	5.22733		30.3856	5.81284
	4.59545	23.7189	5.1614		23.7189	4.59545
	3.67636	18.8582	5.12957		18.8582	3.67636
	23.4863	4.59545	5.11077		23.4863	4.59545
	16.5691	3.31383	5		16.5691	3.31383
	18.7458	3.78951	4.94678		18.7458	3.78951
	19.7978	4.1103	4.81664		19.7978	4.1103
	2.75727	12.8673	4.66667		12.8673	2.75727
	6.16544	28.5362	4.62841		28.5362	6.16544
	5.35917	24.7473	4.61774		24.7473	5.35917
	18.9475	4.1103	4.60977		18.9475	4.1103
	3.67636	16.7718	4.56207		16.7718	3.67636
	20.7966	4.59545	4.52548		20.7966	4.59545
	99.436	22.2488	4.46927		99.436	22.2488
	20.4071	4.59545	4.44072		20.4071	4.59545
	14.5321	3.31383	4.38529		14.5321	3.31383
	50.0208	11.6257	4.30262		50.0208	11.6257
	17.6551	4.1103	4.29535		17.6551	4.1103
	4.59545	19.4752	4.23792		19.4752	4.59545
	5.59061	23.6297	4.22668		23.6297	5.59061
	40.4504	9.59558	4.21552		40.4504	9.59558
	2.90642	11.9835	4.12311		11.9835	2.90642
	20.4071	4.94945	4.12311		20.4071	4.94945
	4.1103	16.5691	4.03113		16.5691	4.1103
	4.94945	19.883	4.0172		19.883	4.94945
PITS/GOUGES	3.78951	15.0742	3.97788	44.8649
	22.2108	5.59061	3.97288	97.5244
	3.31383	12.9979	3.92232	33.8293
	3.78951	14.8484	3.91828	44.1927
	33.7195	8.71926	3.86724	230.914
	5.35917	20.3449	3.79628	85.6335
	17.2681	4.59545	3.75766	62.3252
	34.5363	9.1909	3.75766	249.301
	4.1103	15.2137	3.70135	49.113
	9.59558	2.59958	3.69121	19.5914
	4.59545	16.8973	3.67696	60.9866
	4.94945	18.104	3.65777	70.3754
	35.2265	124.919	3.54616	3456.1
	6.43363	1.83818	3.5	9.28826
	19.4968	68.0996	3.49285	1042.79
	25.6359	7.40994	3.45966	149.194
	26.6536	7.79874	3.41768	163.256
	26.7959	7.85271	3.41231	165.264
	3.78951	12.9	3.40415	38.394
	2.75727	9.37292	3.39935	20.2976
	11.2189	3.31383	3.38549	29.1992
	26.7169	7.90631	3.37919	165.902
	9.23674	31.2085	3.37873	226.403
	11.0673	3.31383	3.33974	28.8046
	17.4385	5.35917	3.25396	73.4001
	7.79874	25.2374	3.23608	154.582
	5.59061	18.0573	3.22993	79.2868
	3.78951	11.9835	3.16228	35.6661
	3.78951	11.9835	3.16228	35.6661
	16.9472	5.35917	3.16228	71.3321
	4.1103	12.9979	3.16228	41.9601
	20.2409	6.43363	3.1461	102.276
	11.5162	3.78951	3.03896	34.2752
	4.59545	13.9084	3.02655	50.1989
	5.51454	16.5436	3	71.6523
	5.35917	15.866	2.96052	66.7811
	13.6633	4.68646	2.91548	50.2909
	4.94945	14.2681	2.88277	55.4643
	6.16544	17.6791	2.86744	85.6078
	5.88505	2.05515	2.86356	9.49911
	7.40994	2.59958	2.85044	15.1289
	2.90642	8.22059	2.82843	18.7651
	16.2863	45.9361	2.82053	587.58
	48.1098	17.0961	2.81409	645.981
	6.43363	18.104	2.81396	91.4787
	13.1594	4.68646	2.80796	48.4362
	3.31383	9.1909	2.7735	23.9209
	4.94945	12.9979	2.62613	50.5266
	4.68646	11.9482	2.54951	43.9781
	5.81284	14.8199	2.54951	67.6586
	3.67636	9.37292	2.54951	27.0634
	14.9617	37.4917	2.50584	440.561
	5.59061	13.7864	2.46598	60.5338
	13.0627	5.35917	2.43745	54.9821
	2.75727	6.43363	2.33333	13.9324
	9.05199	3.89937	2.3214	27.7222
	6.16544	14.2681	2.31421	69.0909
	4.1103	9.46261	2.30217	30.5474
	4.1103	9.46261	2.30217	30.5474
	14.9617	6.49895	2.30217	76.3685
	4.68646	10.7183	2.28709	39.4514
	3.67636	8.32272	2.26385	24.0311
	5.88505	2.59958	2.26385	12.0155
	6.49895	14.7054	2.26274	75.0604
	3.67636	8.27181	2.25	23.8841
	7.40994	3.31383	2.23607	19.2857
	5.19916	11.5162	2.21501	47.0252
	6.43363	2.90642	2.21359	14.686
	14.7054	6.69108	2.19777	77.2795
	7.40994	16.2604	2.1944	94.6313
	12.2622	26.8431	2.18909	258.518
	20.9786	9.59558	2.18628	158.102
	5.51454	11.9482	2.16667	51.7489
	4.68646	10.1517	2.16617	37.3657
	2.59958	5.59061	2.15058	11.4144
	30.3856	14.2681	2.12962	340.506
	20.654	9.77006	2.11401	158.486
	8.47359	17.8455	2.10601	118.764
	12.0887	5.81284	2.07966	55.1899
	5.35917	11.1054	2.07223	46.7436
	5.59061	2.75727	2.02759	12.1068
	5.51454	2.75727	2	11.942
	7.40994	14.8199	2	86.2481
	6.49895	12.9979	2	66.3447
	8.22059	4.1103	2	26.5379
	16.8723	8.47359	1.99116	112.287
	17.3414	8.71926	1.98886	118.755
	7.40994	14.7341	1.98843	85.7491
	4.68646	9.1909	1.96116	33.8293
	6.16544	12.0887	1.96073	58.5377
	8.32272	16.2863	1.95685	106.458
	16.0512	8.32272	1.9286	104.921
	7.90631	4.1103	1.92354	25.5233
	6.69108	12.8014	1.91321	67.2736
	4.94945	9.46261	1.91185	36.7839
	5.81284	11.1054	1.9105	50.7005
	3.89937	2.05515	1.89737	6.29401
	4.94945	9.37292	1.89373	36.4353
	5.88505	11.0673	1.88058	51.1543
	6.43363	12.0887	1.87899	61.084
	13.9084	7.40994	1.87699	80.9432
	5.59061	10.4792	1.87444	46.0128
	3.31383	6.16544	1.86052	16.0466
	3.31383	6.16544	1.86052	16.0466
	12.3309	22.7556	1.84541	220.38
	2.90642	5.35917	1.84391	12.2334
	3.67636	6.69108	1.82003	19.3199
	7.57901	13.6633	1.80278	81.3311
	5.35917	9.59558	1.7905	40.3886
	53.1008	29.6967	1.7881	1238.51
	11.7701	6.62765	1.77591	61.2674
	3.67636	6.49895	1.76777	18.7651
	4.94945	8.71926	1.76166	33.8943
	7.35272	12.9	1.75446	74.4954
	7.35272	12.9	1.75446	74.4954
	4.68646	8.22059	1.75412	30.2578
	8.22059	4.68646	1.75412	30.2578
	3.78951	6.62765	1.74895	19.7257
	9.59558	16.7718	1.74787	126.398
	9.94148	17.3414	1.74434	135.402
	7.90631	4.59545	1.72047	28.5359
	11.0673	6.43363	1.72023	55.9227
	6.49895	3.78951	1.71499	19.3426
	14.0594	24.0549	1.71095	265.619
	7.85271	4.59545	1.7088	28.3425
	9.8989	5.81284	1.70294	45.1924
	6.49895	11.0673	1.70294	56.4905
	17.4869	10.2757	1.70176	141.129
	8.71926	14.8199	1.69967	101.488
	6.43363	3.78951	1.69775	19.1482
	6.43363	3.78951	1.69775	19.1482
	5.35917	9.09853	1.69775	38.2965
	8.32272	14.0594	1.68928	91.9012
	12.501	7.40994	1.68705	72.7526
	9.8989	16.6454	1.68154	129.411
	6.99958	11.7701	1.68154	64.7056
	6.16544	3.67636	1.67705	17.8021
	5.59061	9.37292	1.67655	41.1551
	5.51454	9.23674	1.67498	40.0054
	8.32272	13.817	1.66015	90.3165
	6.49895	10.7577	1.65529	54.91
	6.69108	11.0673	1.65404	58.1605
	20.2409	33.0872	1.63468	525.992
	5.35917	8.71926	1.62698	36.7001
	5.59061	9.05199	1.61914	39.746
	11.9835	19.3882	1.61791	182.478
	16.9472	10.4792	1.61722	139.482
	22.0582	13.6633	1.61441	236.708
	4.59545	7.40994	1.61245	26.7444
	19.3228	11.9835	1.61245	181.862
	5.88505	9.46261	1.60791	43.7372
	9.37292	5.88505	1.59267	43.3226
	4.94945	7.85271	1.58658	30.5258
	4.59545	2.90642	1.58114	10.49
	7.40994	11.6981	1.5787	68.0801
	10.1517	15.866	1.56289	126.501
	7.17832	4.59545	1.56205	25.9084
	6.49895	10.11	1.55563	51.6041
	13.1594	8.47359	1.55299	87.5775
	5.88505	9.09853	1.54604	42.0544
	10.2757	6.69108	1.53574	54.0007
	3.78951	5.81284	1.53393	17.3006
	4.94945	7.57901	1.53128	29.4618
	6.99958	4.59545	1.52315	25.2633
	12.9	19.6479	1.52309	199.066
	3.67636	5.59061	1.52069	16.1424
	5.59061	8.47359	1.51568	37.2063
	5.51454	3.67636	1.5	15.9227
	16.5691	11.0673	1.49712	144.023
	4.68646	6.99958	1.49358	25.7636
	6.16544	9.1909	1.49071	44.5054
	5.59061	8.32272	1.4887	36.5438
	8.32272	5.59061	1.4887	36.5438
	7.90631	11.7701	1.4887	73.0876
	5.59061	3.78951	1.47529	16.6392
	3.78951	5.59061	1.47529	16.6392
	28.6249	42.1781	1.47348	948.246
	10.11	14.7341	1.45738	116.994
	13.9084	20.22	1.4538	220.875
	8.32272	12.0887	1.4525	79.0198
	14.8484	21.5154	1.44901	250.909
	19.3228	27.6492	1.43091	419.606
	8.47359	12.0887	1.42664	80.4523
	5.19916	7.40994	1.42522	30.2578
	4.59545	6.49895	1.41421	23.4564
	5.81284	4.1103	1.41421	18.7651
	5.35917	3.78951	1.41421	15.9503
	10.4792	7.40994	1.41421	60.9866
	12.501	17.6551	1.4123	173.343
	6.43363	9.05199	1.40698	45.7394
	6.69108	9.37292	1.40081	49.2562
	26.6536	37.3223	1.40027	781.294
	4.59545	6.43363	1.4	23.2206
	4.59545	6.43363	1.4	23.2206
	11.9482	16.6454	1.39314	156.202
	6.49895	4.68646	1.38675	23.9209
	4.68646	6.49895	1.38675	23.9209
	4.68646	6.49895	1.38675	23.9209
	23.6297	32.5726	1.37846	604.508
	7.35272	10.11	1.375	58.3833
	2.75727	3.78951	1.37437	8.20638
	9.09853	6.62765	1.37281	47.361
	8.32272	11.3685	1.36596	74.312
	15.7323	21.4564	1.36384	265.117
	10.1517	13.7864	1.35804	109.92
	8.32272	11.2189	1.34799	73.3341
	5.51454	7.40994	1.34371	32.0933
	5.51454	7.40994	1.34371	32.0933
	8.32272	11.1812	1.34346	73.0876
	7.57901	10.11	1.33395	60.1802
	2.75727	3.67636	1.33333	7.96136
	3.67636	2.75727	1.33333	7.96136
	2.75727	3.67636	1.33333	7.96136
	5.59061	7.40994	1.32543	32.536
	5.59061	7.40994	1.32543	32.536
	7.40994	5.59061	1.32543	32.536
	7.90631	10.4792	1.32543	65.0719
	10.11	13.3822	1.32366	106.259
	5.59061	7.35272	1.31519	32.2847
	5.59061	7.35272	1.31519	32.2847
	4.94945	3.78951	1.30609	14.7309
	3.78951	2.90642	1.30384	8.65029
	6.49895	8.47359	1.30384	43.2514
	4.1103	5.35917	1.30384	17.3006
	9.23674	11.9482	1.29355	86.6783
	7.35272	9.46261	1.28695	54.6448
	13.6633	17.5592	1.28514	188.429
	12.2622	15.7323	1.28299	151.513
	8.22059	6.43363	1.27775	41.5383
	11.9482	9.37292	1.27475	87.9561
	4.68646	3.67636	1.27475	13.5317
	5.81284	7.40994	1.27475	33.8293
	7.35272	9.37292	1.27475	54.1269
	6.16544	7.85271	1.27366	38.0254
	8.27181	6.49895	1.27279	42.2215
	6.69108	8.47359	1.2664	44.5301
	7.35272	5.81284	1.26491	33.5681
	10.4792	8.32272	1.25911	68.4991
	11.9482	14.9617	1.25222	140.402
	10.2757	12.8673	1.2522	103.846
	4.59545	3.67636	1.25	13.2689
	3.67636	4.59545	1.25	13.2689
	6.16544	4.94945	1.24568	23.9669
	6.99958	8.71926	1.24568	47.9338
	4.68646	5.81284	1.24035	21.3955
	7.40994	9.1909	1.24035	53.4888
	6.99958	8.67068	1.23874	47.6667
	4.68646	3.78951	1.23669	13.9482
	6.62765	5.35917	1.23669	27.8963
	8.67068	10.7183	1.23616	72.9912
	27.7102	34.1179	1.23124	742.528
	7.35272	9.05199	1.23111	52.2736
	7.57901	9.23674	1.21873	54.9821
	11.5162	9.46261	1.21702	85.5872
	4.59545	5.59061	1.21655	20.1779
	5.59061	4.59545	1.21655	20.1779
	3.78951	4.59545	1.21268	13.6773
	9.59558	11.5162	1.20015	86.7899
	4.59545	5.51454	1.2	19.9034
	5.51454	4.59545	1.2	19.9034
	4.59545	5.51454	1.2	19.9034
	9.23674	11.0673	1.19818	80.288
	5.59061	6.69108	1.19684	29.3795
	4.68646	5.59061	1.19293	20.5776
	5.59061	4.68646	1.19293	20.5776
	4.94945	5.88505	1.18903	22.8769
	11.9482	10.11	1.18182	94.8729
	5.51454	6.49895	1.17851	28.1477
	5.51454	6.49895	1.17851	28.1477
	6.43363	7.57901	1.17803	38.2965
	4.94945	5.81284	1.17444	22.5962
	11.9835	14.0594	1.17323	132.324
	14.5321	16.9472	1.16619	193.426
	6.49895	7.57901	1.16619	38.6853
	5.59061	6.49895	1.16248	28.5359
	6.49895	5.59061	1.16248	28.5359
	5.59061	6.49895	1.16248	28.5359
	5.59061	6.49895	1.16248	28.5359
	8.27181	9.59558	1.16003	62.3393
	17.4627	20.2409	1.15909	277.607
	9.59558	8.32272	1.15294	62.7229
	7.35272	8.47359	1.15244	48.9334
	6.43363	7.40994	1.15175	37.4422
	6.69108	5.81284	1.15109	30.5474
	7.40994	8.47359	1.14354	49.3142
	7.40994	8.47359	1.14354	49.3142
	4.68646	5.35917	1.14354	19.7257
	6.43363	7.35272	1.14286	37.153
	7.40994	6.49895	1.14018	37.8223
	6.49895	7.40994	1.14018	37.8223
	7.35272	8.32272	1.13192	48.0621
	6.49895	7.35272	1.13137	37.5302
	37.6939	42.368	1.124	1254.29
	7.40994	8.32272	1.12318	48.4362
	27.953	31.3705	1.12226	688.716
	5.51454	4.94945	1.11417	21.4366
	8.27181	9.1909	1.11111	59.7102
	33.2019	29.9234	1.10956	780.305
	7.17832	7.90631	1.10141	44.5745
	16.2863	14.8199	1.09895	189.565
	9.37292	10.2757	1.09632	75.6446
	11.9835	12.9979	1.08465	122.334
	3.78951	4.1103	1.08465	12.2334
	5.35917	4.94945	1.08278	20.8327
	11.9835	11.0673	1.08278	104.163
	7.85271	8.47359	1.07907	52.2609
	11.9835	12.9	1.07649	121.413
	8.47359	9.05199	1.06826	60.2423
	7.40994	7.90631	1.06699	46.0128
	8.32272	7.85271	1.05985	51.3304
	4.68646	4.94945	1.05612	18.2176
	4.68646	4.94945	1.05612	18.2176
	4.94945	4.68646	1.05612	18.2176
	8.22059	8.67068	1.05475	55.9817
	5.81284	5.51454	1.05409	25.176
	7.35272	6.99958	1.05045	40.4213
	16.5436	15.866	1.04271	206.152
	5.81284	5.59061	1.03975	25.5233
	8.22059	7.90631	1.03975	51.0466
	26.6695	27.588	1.03444	577.863
	3.78951	3.67636	1.03078	10.9418
	3.78951	3.67636	1.03078	10.9418
	6.69108	6.49895	1.02956	34.153
	6.49895	6.69108	1.02956	34.153
	12.2622	11.9482	1.02628	115.069
	10.1517	9.8989	1.02554	78.9251
	27.588	26.906	1.02535	582.987
	4.59545	4.68646	1.0198	16.9146
	4.68646	4.59545	1.0198	16.9146
	4.59545	4.68646	1.0198	16.9146
	4.68646	4.59545	1.0198	16.9146
	4.68646	4.59545	1.0198	16.9146
	4.68646	4.59545	1.0198	16.9146
	4.59545	4.68646	1.0198	16.9146
	8.47359	8.32272	1.01813	55.3889
	9.37292	9.23674	1.01474	67.996
	9.37292	9.23674	1.01474	67.996
	9.23674	9.37292	1.01474	67.996
	5.59061	5.59061	1	24.5475
	5.51454	5.51454	1	23.8841
	9.23674	9.23674	1	67.0081
	3.67636	3.67636	1	10.6152
	4.59545	4.59545	1	16.5862
	4.68646	4.68646	1	17.2496
	6.49895	6.49895	1	33.1723
	7.35272	7.35272	1	42.4606
	2.90642	2.90642	1	6.63447
	3.67636	3.67636	1	10.6152
	4.1103	4.1103	1	13.2689
	3.67636	3.67636	1	10.6152
	4.59545	4.59545	1	16.5862
	5.59061	5.59061	1	24.5475
	4.94945	4.94945	1	19.24
	6.43363	6.43363	1	32.5089
	8.32272	8.32272	1	54.4026
	7.35272	7.35272	1	42.4606
	4.94945	4.94945	1	19.24
	8.32272	8.32272	1	54.4026
	8.32272	8.32272	1	54.4026

## Sheet: DiplodocusCM11161LP1
	Length 1	Length 2	Ratio	Area	Scratch Length	Scratch Breadth
SCRATCHES	222.568	2.0625	107.912		222.568	2.0625
	79.437	0.922378	86.122		79.437	0.922378
	138.073	1.84476	74.8465		138.073	1.84476
	113.276	2.0625	54.9218		113.276	2.0625
	172.455	3.32568	51.8556		172.455	3.32568
	90.0394	1.84476	48.8083		90.0394	1.84476
	139.937	2.91681	47.976		139.937	2.91681
	92.353	2.0625	44.7772		92.353	2.0625
	65.5927	1.84476	35.5563		65.5927	1.84476
	65.2806	2.0625	31.6512		65.2806	2.0625
	53.5456	1.84476	29.0259		53.5456	1.84476
	74.2557	2.76713	26.8349		74.2557	2.76713
	118.356	4.61189	25.6632		118.356	4.61189
	58.1098	2.76713	21		58.1098	2.76713
	72.2581	3.68951	19.5848		72.2581	3.68951
	100.793	5.21776	19.3173		100.793	5.21776
	61.3294	3.68951	16.6227		61.3294	3.68951
	33.4227	2.0625	16.2049		33.4227	2.0625
	41.548	2.76713	15.0148		41.548	2.76713
PITS/GOUGES	5.6106	3.68951	1.52069	16.258
	5.53427	3.68951	1.5	16.0368
	15.6804	11.1069	1.41177	136.786
	6.45664	4.61189	1.4	23.387
	6.45664	4.61189	1.4	23.387
	6.45664	4.70322	1.37281	23.8502
	3.68951	2.76713	1.33333	8.01842
	4.61189	3.68951	1.25	13.364
	4.61189	3.68951	1.25	13.364
	5.53427	4.61189	1.2	20.046
	5.53427	4.61189	1.2	20.046
	11.9909	10.3125	1.16276	97.1193
	6.45664	5.83363	1.1068	29.5825
	5.83363	5.83363	1	26.7281

## Sheet: Diplodocus11161RP2
	Length 1	Length 2	Ratio	Area	Scratch Length	Scratch Breadth
SCRATCHES	46.6968	0.922746	50.6063		46.6968	0.922746
	97.8111	2.91798	33.5201		97.8111	2.91798
	61.458	1.84549	33.3017		61.458	1.84549
	91.5381	2.76824	33.0673		91.5381	2.76824
	96.0056	2.91798	32.9014		96.0056	2.91798
	125.67	3.91488	32.1005		125.67	3.91488
	36.1759	1.30496	27.7218		36.1759	1.30496
	56.5592	2.06332	27.4117		56.5592	2.06332
	52.1984	2.06332	25.2982		52.1984	2.06332
	72.9203	3.80458	19.1665		72.9203	3.80458
	69.8184	4.61373	15.1327		69.8184	4.61373
	44.0219	2.91798	15.0864		44.0219	2.91798
	36.5389	2.60992	14		36.5389	2.60992
	56.1133	4.61373	12.1622		56.1133	4.61373
	67.4615	6.18997	10.8985		67.4615	6.18997
	48.1688	4.61373	10.4403		48.1688	4.61373
	17.9165	1.84549	9.70824		17.9165	1.84549
	43.76	4.61373	9.48472		43.76	4.61373
	34.8818	3.69099	9.45053		34.8818	3.69099
	30.1274	3.32701	9.05539		30.1274	3.32701
	29.9431	3.32701	9		29.9431	3.32701
	42.0837	4.7051	8.94427		42.0837	4.7051
	50.4482	6.5248	7.73175		50.4482	6.5248
	19.7476	2.91798	6.76757		19.7476	2.91798
	22.8461	4.61373	4.95177		22.8461	4.61373
	13.0496	2.91798	4.47214		13.0496	2.91798
PITS/GOUGES	6.45923	2.76824	2.33333	14.0435
	5.38049	2.76824	1.94365	11.6981
	7.02743	3.69099	1.90394	20.3718
	11.1113	6.18997	1.79505	54.0188
	3.69099	2.06332	1.78885	5.98136
	6.45923	3.69099	1.75	18.7246
	6.65402	3.91488	1.69967	20.4594
	9.4102	5.61285	1.67655	41.4832
	4.61373	2.76824	1.66667	10.031
	4.61373	2.76824	1.66667	10.031
	3.32701	2.06332	1.61245	5.39152
	2.76824	1.84549	1.5	4.01242
	5.53648	3.69099	1.5	16.0497
	4.12665	2.76824	1.49071	8.97203
	5.90846	4.12665	1.43178	19.1497
	3.69099	2.60992	1.41421	7.56588
	4.61373	3.32701	1.38675	12.0558
	6.7177	4.96914	1.35188	26.2175
	3.69099	2.76824	1.33333	8.02483
	3.69099	2.76824	1.33333	8.02483
	3.69099	2.76824	1.33333	8.02483
	3.69099	2.91798	1.26491	8.45892
	9.22746	7.38197	1.25	53.4989
	4.61373	3.69099	1.25	13.3747
	5.83596	4.7051	1.24035	21.5661
	5.61285	4.61373	1.21655	20.3388
	4.61373	3.80458	1.21268	13.7863
	5.53648	4.61373	1.2	20.0621
	5.53648	4.61373	1.2	20.0621
	2.91798	2.76824	1.05409	6.34419
	2.91798	2.76824	1.05409	6.34419
	6.65402	6.5248	1.0198	34.099
	5.61285	5.53648	1.01379	24.4066
	4.61373	4.61373	1	16.7184
	3.69099	3.69099	1	10.6998
	2.76824	2.76824	1	6.01862
	2.76824	2.76824	1	6.01862

## Sheet: DiplodocusUSNM2673
	L1	L2	Ratio	Area	Scratch Length	Scratch Breadth
SCRATCHES	865.294	2.76709	312.709		865.294	2.76709
	887.035	6.45654	137.386		887.035	6.45654
	235.231	1.84473	127.516		235.231	1.84473
	687.222	5.53418	124.178		687.222	5.53418
	344.623	2.91677	118.152		344.623	2.91677
	305.619	2.76709	110.448		305.619	2.76709
	341.634	3.32563	102.728		341.634	3.32563
	272.661	2.76709	98.5371		272.661	2.76709
	285.262	2.91677	97.8008		285.262	2.91677
	349.887	4.12493	84.8225		349.887	4.12493
	200.948	2.76709	72.6208		200.948	2.76709
	189.946	2.76709	68.6448		189.946	2.76709
	236.056	3.68945	63.9814		236.056	3.68945
	193.058	3.32563	58.0517		193.058	3.32563
	319.159	5.53418	57.6705		319.159	5.53418
	158.093	2.76709	57.1334		158.093	2.76709
	143.832	2.76709	51.9797		143.832	2.76709
	253.393	4.96707	51.0145		253.393	4.96707
	137.367	2.76709	49.6432		137.367	2.76709
	215.108	4.61181	46.6429		215.108	4.61181
	198.413	4.61181	43.0228		198.413	4.61181
	285.727	7.3789	38.7222		285.727	7.3789
	158.863	4.12493	38.513		158.863	4.12493
	196.426	5.53418	35.4933		196.426	5.53418
	89.8534	2.76709	32.4722		89.8534	2.76709
	132.721	4.61181	28.7785		132.721	4.61181
	165.977	6.45654	25.7067		165.977	6.45654
	95.7526	3.91325	24.4688		95.7526	3.91325
	70.6074	2.91677	24.2074		70.6074	2.91677
	100.402	4.61181	21.7706		100.402	4.61181
	93.9362	4.61181	20.3686		93.9362	4.61181
	86.2939	4.61181	18.7115		86.2939	4.61181
	59.2972	3.68945	16.0721		59.2972	3.68945
	180.22	12.4091	14.5232		180.22	12.4091
	61.0782	4.61181	13.2439		61.0782	4.61181
	72.7322	5.61051	12.9636		72.7322	5.61051
	68.5595	6.45654	10.6186		68.5595	6.45654
PITS/GOUGES	15.015	33.2563	2.21487	392.182
	7.0245	12.9131	1.83829	71.2419
	7.93446	5.21767	1.52069	32.515
	6.45654	9.22363	1.42857	46.7726
	53.5685	71.4518	1.33384	3006.17
	5.53418	7.3789	1.33333	32.0726
	3.68945	4.61181	1.25	13.3636
	12.946	15.6802	1.2112	159.432
	7.3789	6.45654	1.14286	37.4181
	9.26963	8.35235	1.10982	60.808
	44.6179	49.1715	1.10206	1723.11
	10.146	9.22363	1.1	73.4997
	28.098	30.1572	1.07328	665.512
	3.68945	3.68945	1	10.6909
	5.53418	5.53418	1	24.0545

[truncated: 3 more sheets: NigersaurusG2, NigersaurusG100, RebbachisaurusMNHN1512a]
